# Supplementary material for: Nickel−palladium alloy nanoparticles supported on reduced graphene oxide decorated with metallic aluminum nanoparticles (Al-rGO/NiPd): a multifunctional catalyst for the transfer hydrogenation of nitroarenes and olefins using water as a hydrogen source
Source: Royal Society of Chemistry journal article supplement (doi:10.1039/d0qi01363c), 2021-01-01
Supplement: d0qi01363c1.pdf [file d0qi01363c1.pdf]

## Electronic Supplementary Information

### **Nickel-Palladium Alloy Nanoparticles Supported on the Reduced Graphene Oxide Decorated with Metallic Aluminum Nanoparticles (Al-rGO/NiPd): a multifunctional catalyst for the transfer hydrogenation of nitroarenes and olefines using water as hydrogen source**

Ziya Dağalan<sup>a</sup>, Sepideh Behboudikhiavi<sup>b</sup>, Muhammet Turgut<sup>a</sup>, Melike Sevim<sup>a</sup>, Ahmet Emre Kasapoğlu<sup>c</sup>, Bilal Nişancı<sup>a,\*</sup>, Önder Metin<sup>b,\*</sup>

<sup>a</sup>*Department of Chemistry, Faculty of Science, Atatürk University, 25240 Erzurum, Turkey.*

<sup>b</sup>*Department of Chemistry, Faculty of Science, Koç University, 34450 İstanbul, Turkey*

<sup>c</sup>*East Anatolian High Technology Research and Application Center (DAYTAM), Atatürk University, 25240 Erzurum, TURKEY*

e-mail: [ometin@ku.edu.tr](mailto:ometin@ku.edu.tr); [bnisanci@atauni.edu.tr](mailto:bnisanci@atauni.edu.tr)

### Content

|                                                                                                                                                        |        |
|--------------------------------------------------------------------------------------------------------------------------------------------------------|--------|
| 1. Additional characterization data of Al-rGO/NiPd nanocatalysts.....                                                                                  | S2     |
| 2. The reusability test of Al-rGO/Ni <sub>40</sub> Pd <sub>60</sub> nanocatalysts in the performed THs by using nitrobenzene as a model substrate..... | S2     |
| 3. <sup>1</sup> H-NMR and <sup>13</sup> C-NMR spectra of the yielded products .....                                                                    | S3-S22 |
| 4. <sup>1</sup> H-NMR and <sup>13</sup> C-NMR chemical shifts of the yielded products.....                                                             | S23-26 |
| 5. Mass spectra of the yielded products .....                                                                                                          | S27-34 |

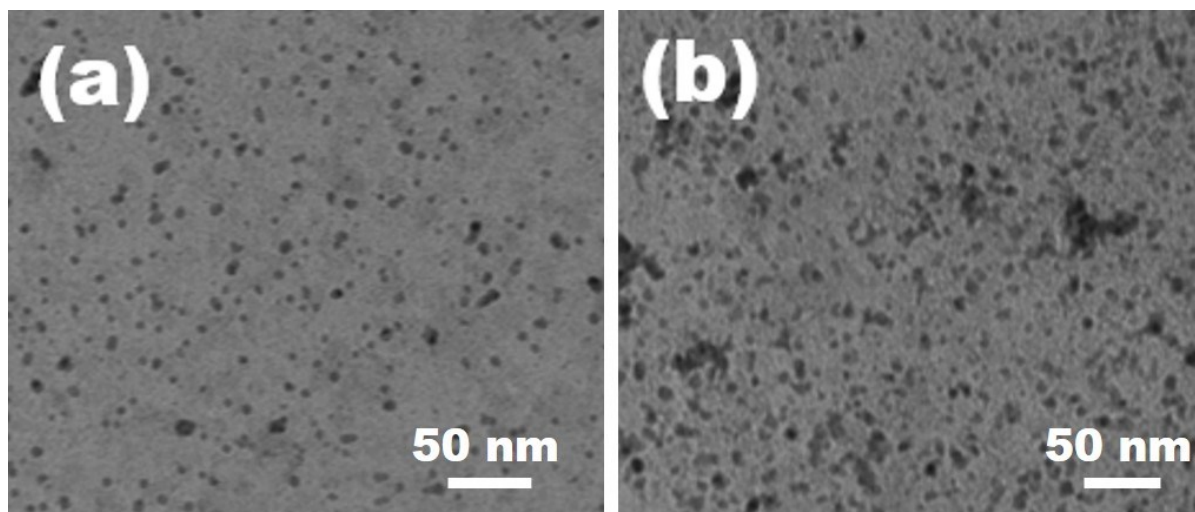

**Figure S1.** The representative TEM images of a) Al-rGO/Ni<sub>20</sub>Pd<sub>80</sub> and b) Al-rGO/Ni<sub>60</sub>Pd<sub>40</sub> nanocatalysts.

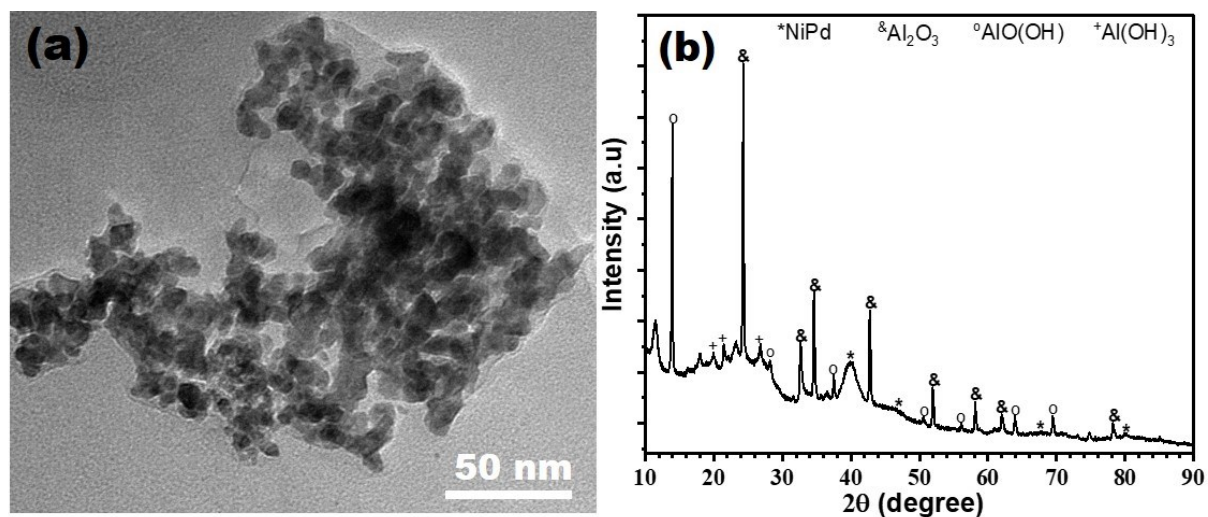

**Figure S2.** (a) TEM and (b) XRD pattern of Al-rGO/Ni<sub>40</sub>Pd<sub>60</sub> nanocatalysts after the 10<sup>th</sup> run of the recyclability test.

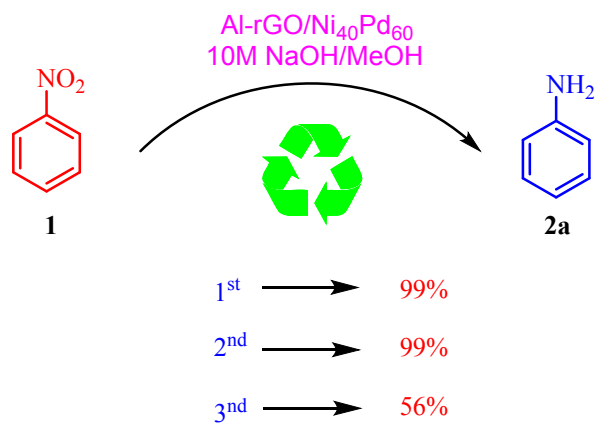

**Figure S3.** The reusability of Al-rGO/Ni<sub>40</sub>Pd<sub>60</sub> nanocatalysts in the TH of nitrobenzene as a model substrate.

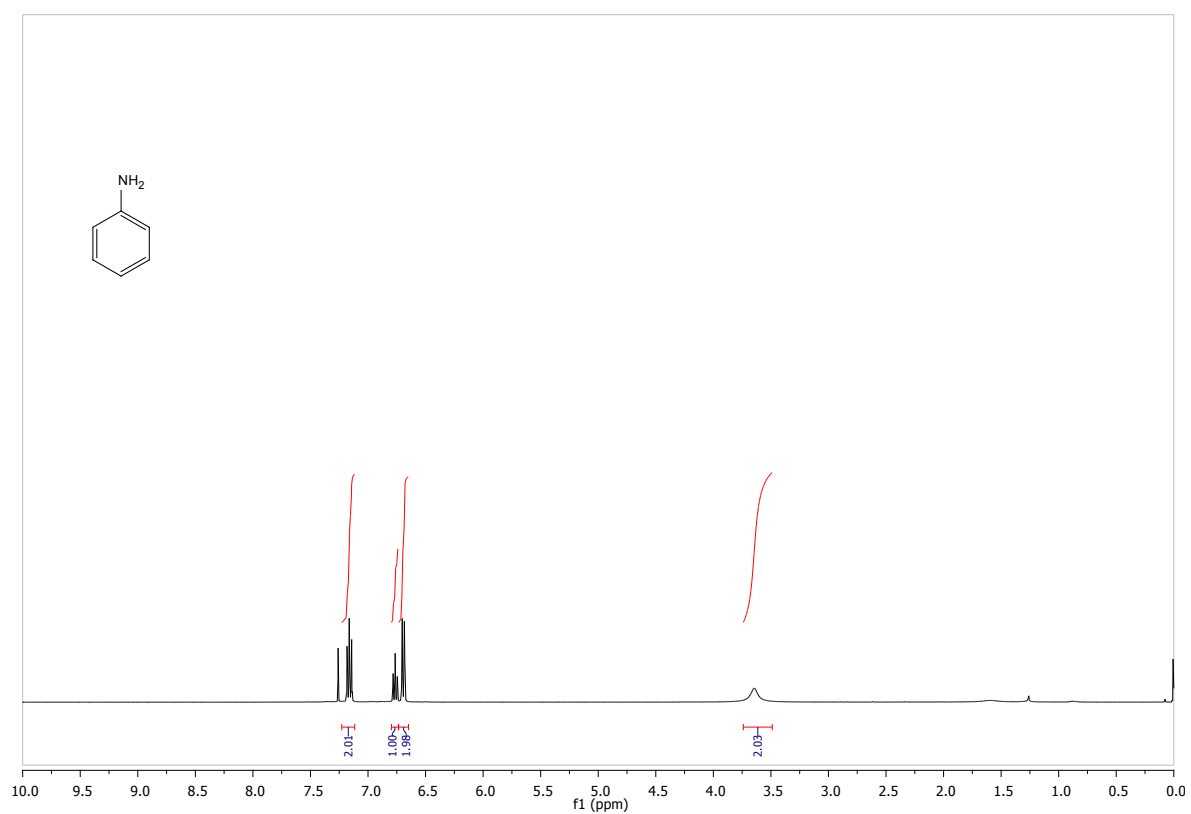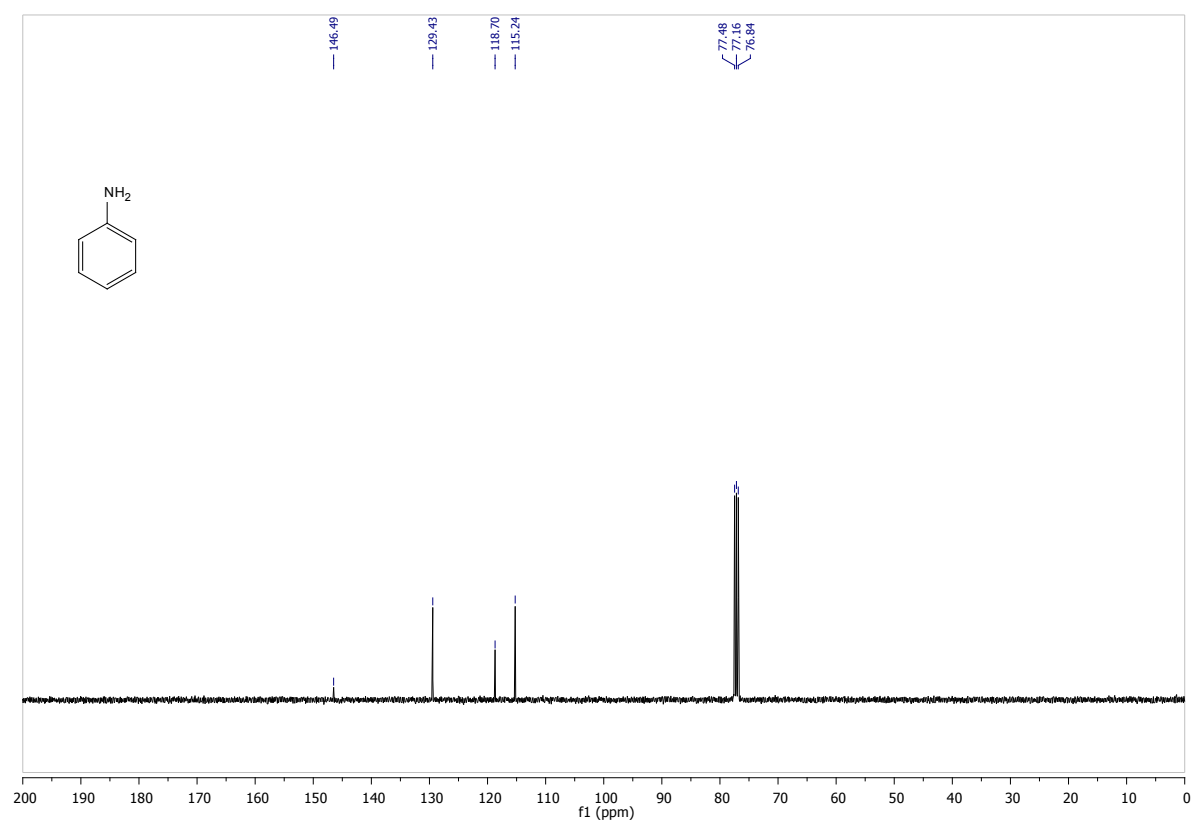

Figure S4.  $^1\text{H}$ -NMR (400 MHz) and  $^{13}\text{C}$ -NMR (100 MHz) spectrum of 2a ( $\text{CDCl}_3$ ).

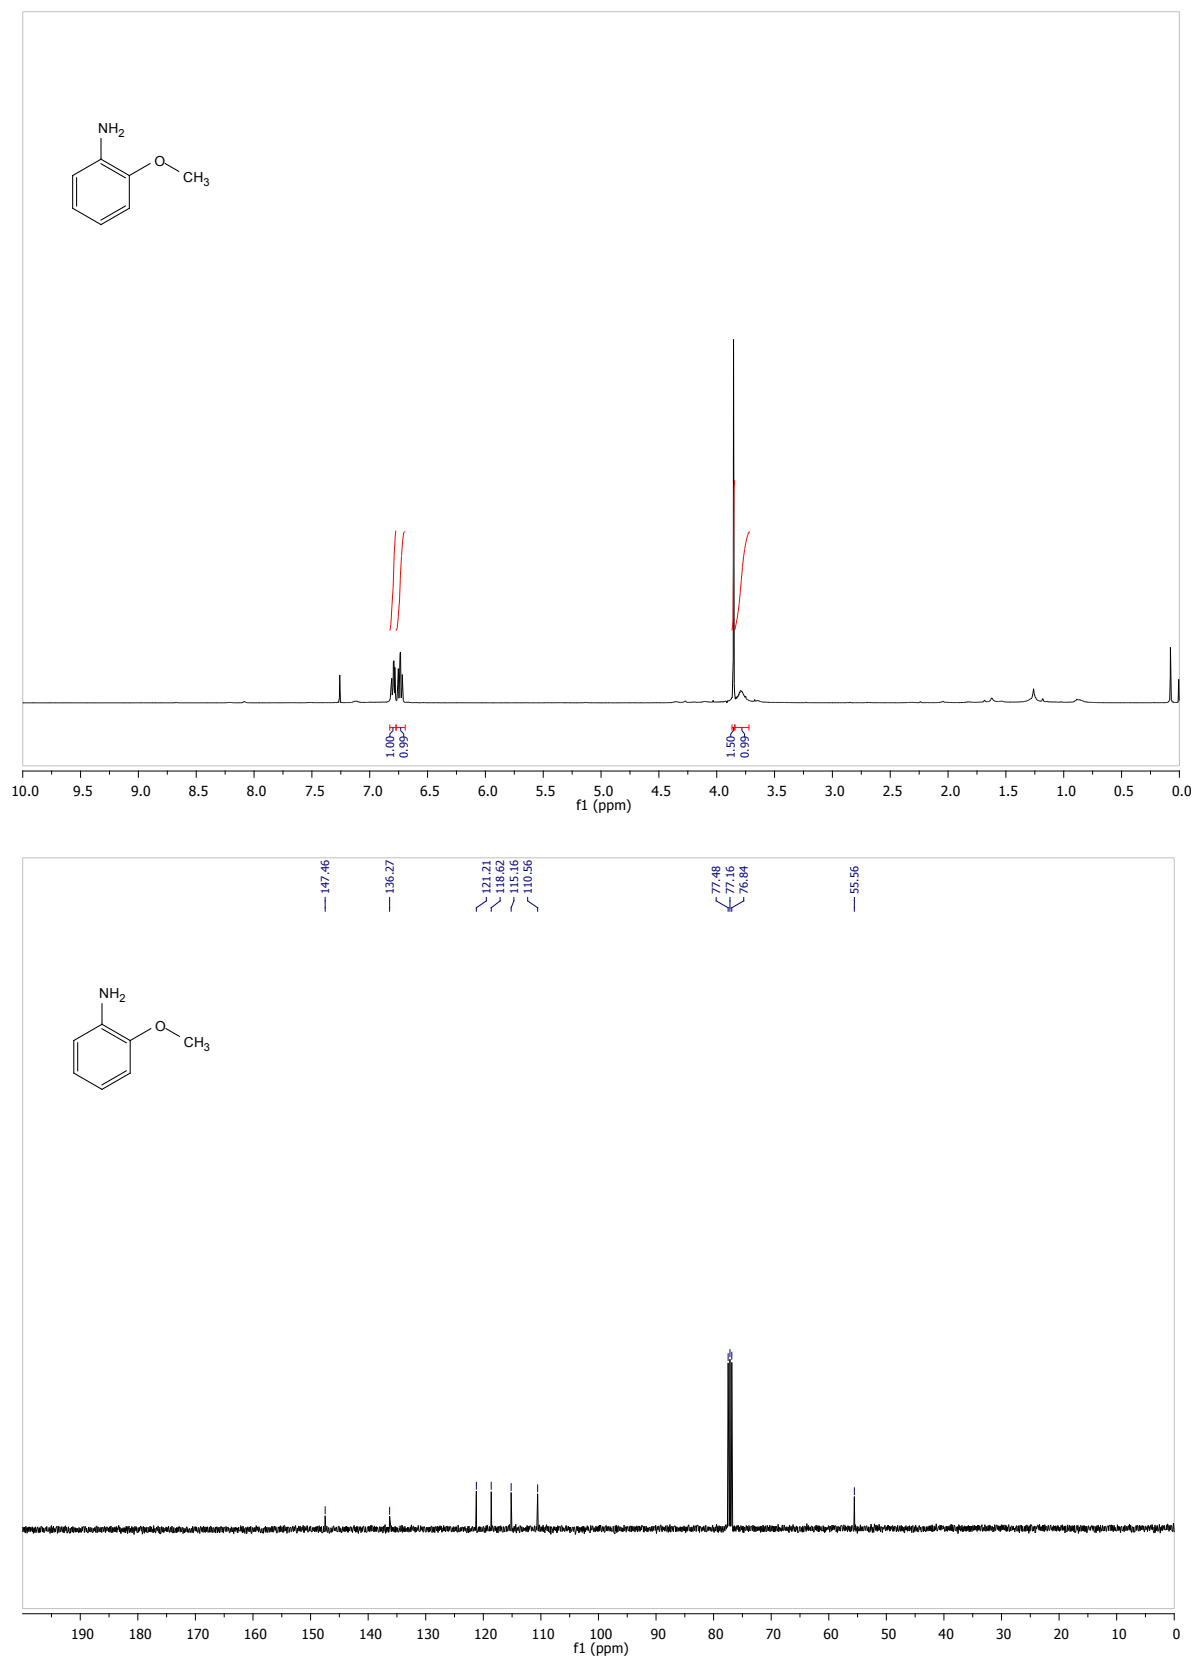

Figure S5. <sup>1</sup>H-NMR (400 MHz) and <sup>13</sup>C-NMR (100 MHz) spectrum of 2f (CDCl<sub>3</sub>).

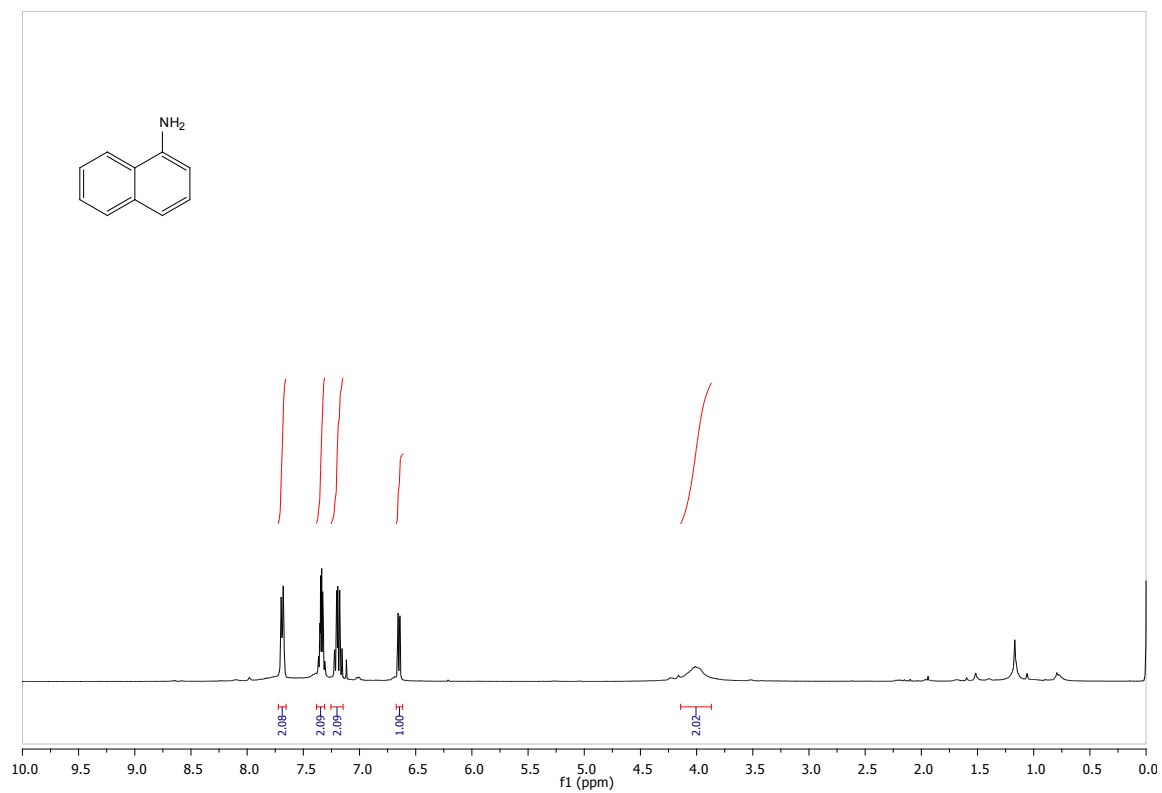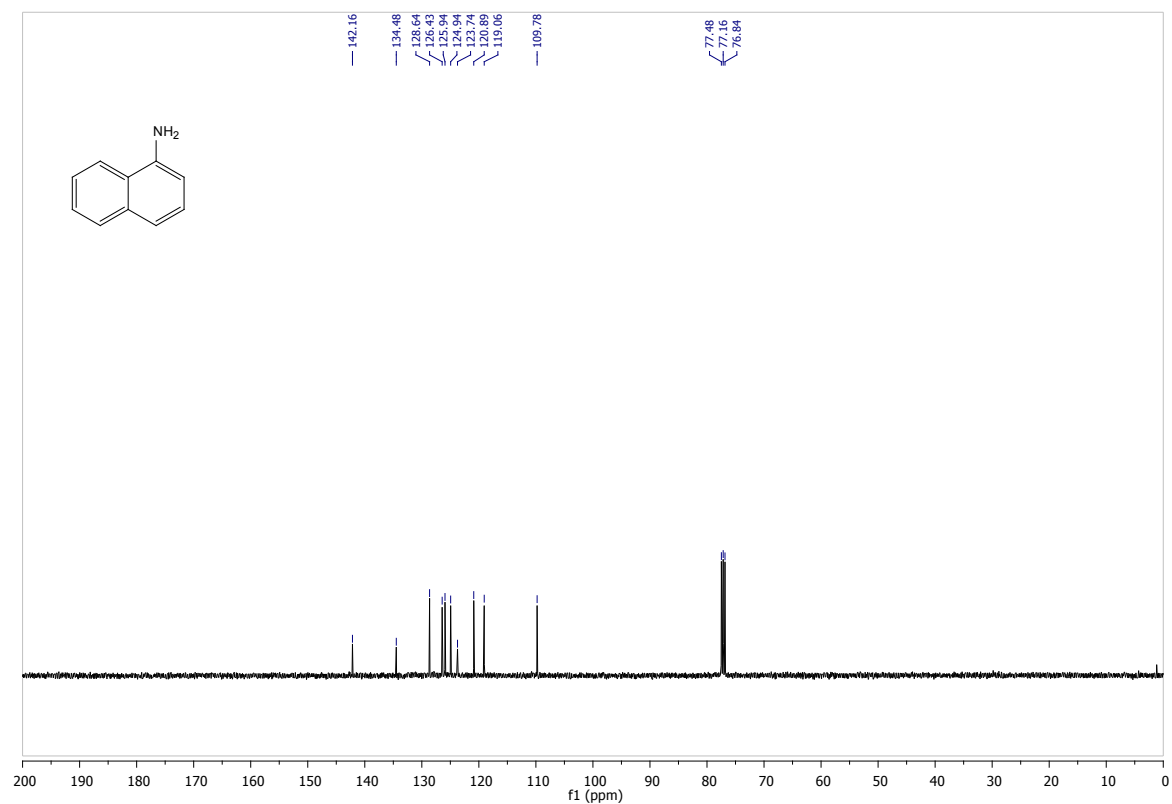

Figure S6.  $^1\text{H-NMR}$  (400 MHz) and  $^{13}\text{C-NMR}$  (100 MHz) spectrum of 2g ( $\text{CDCl}_3$ ).

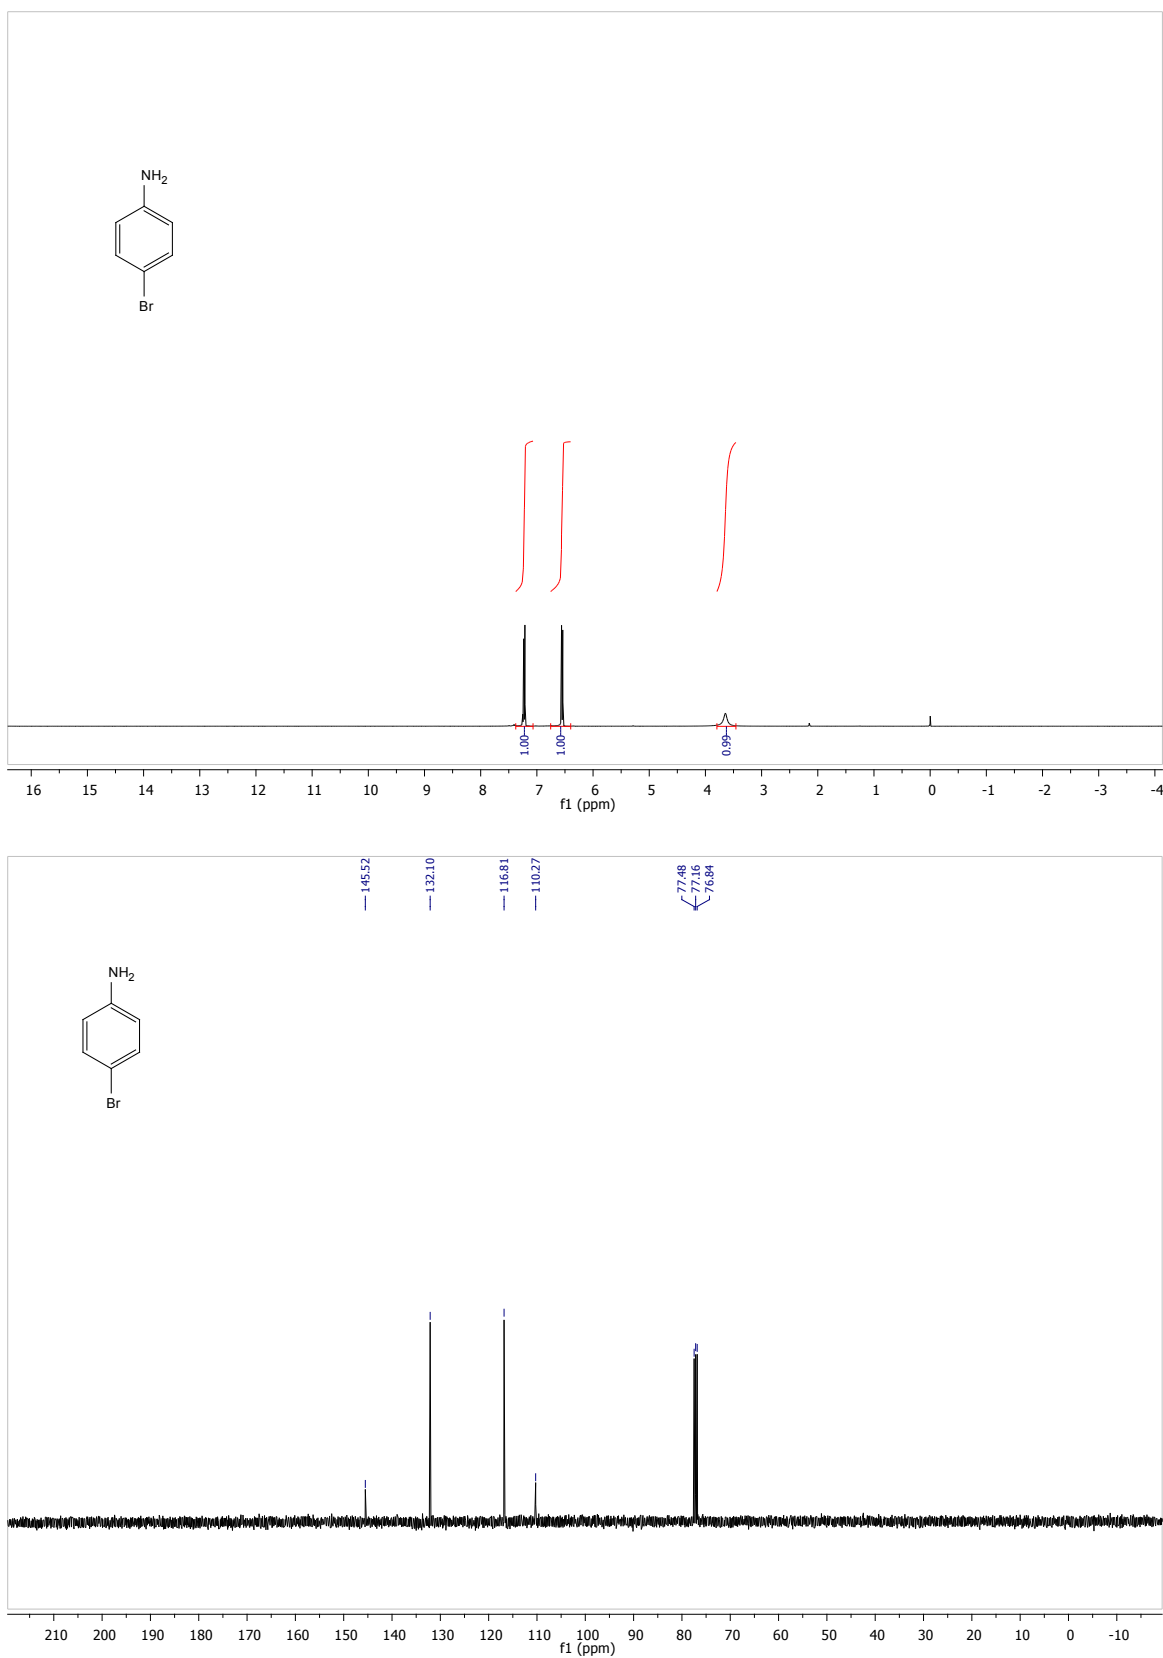

Figure S7. <sup>1</sup>H-NMR (400 MHz) and <sup>13</sup>C-NMR (100 MHz) spectrum of 2h (CDCl<sub>3</sub>).

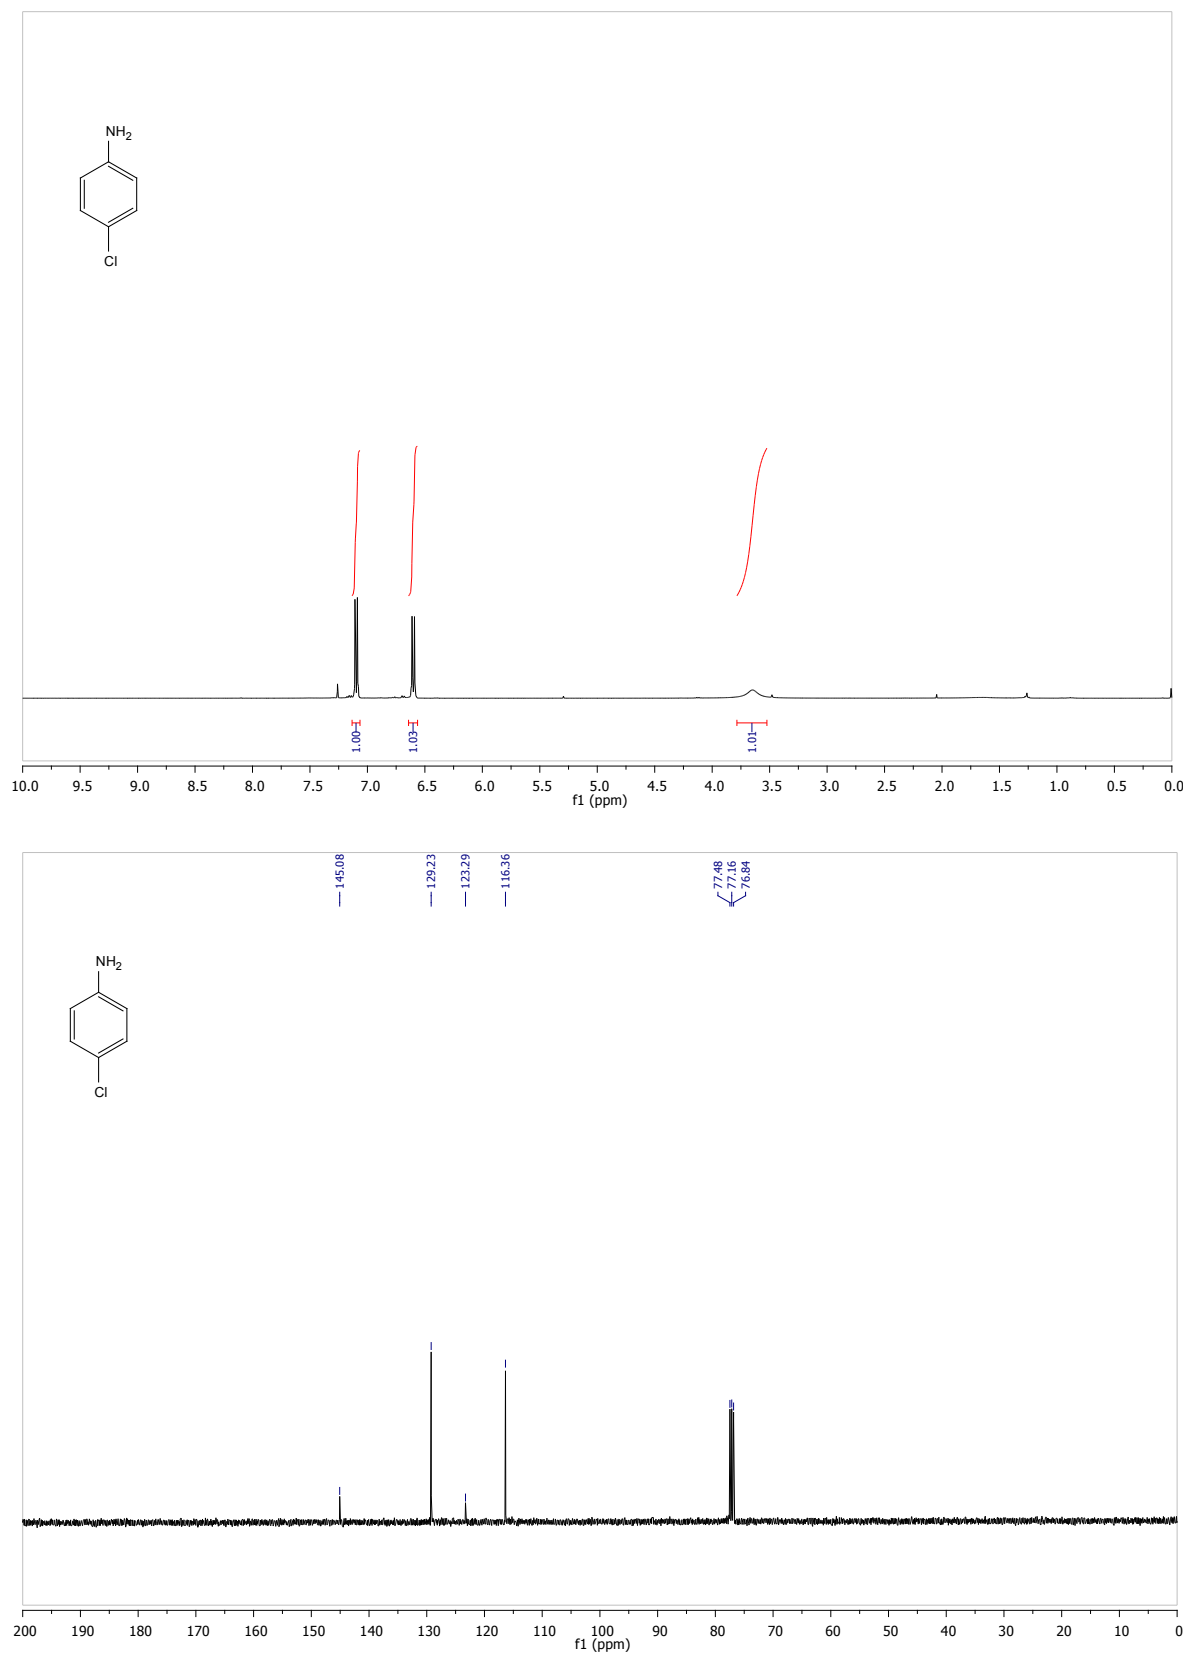

Figure S8. <sup>1</sup>H-NMR (400 MHz) and <sup>13</sup>C-NMR (100 MHz) spectrum of 2i (CDCl<sub>3</sub>).

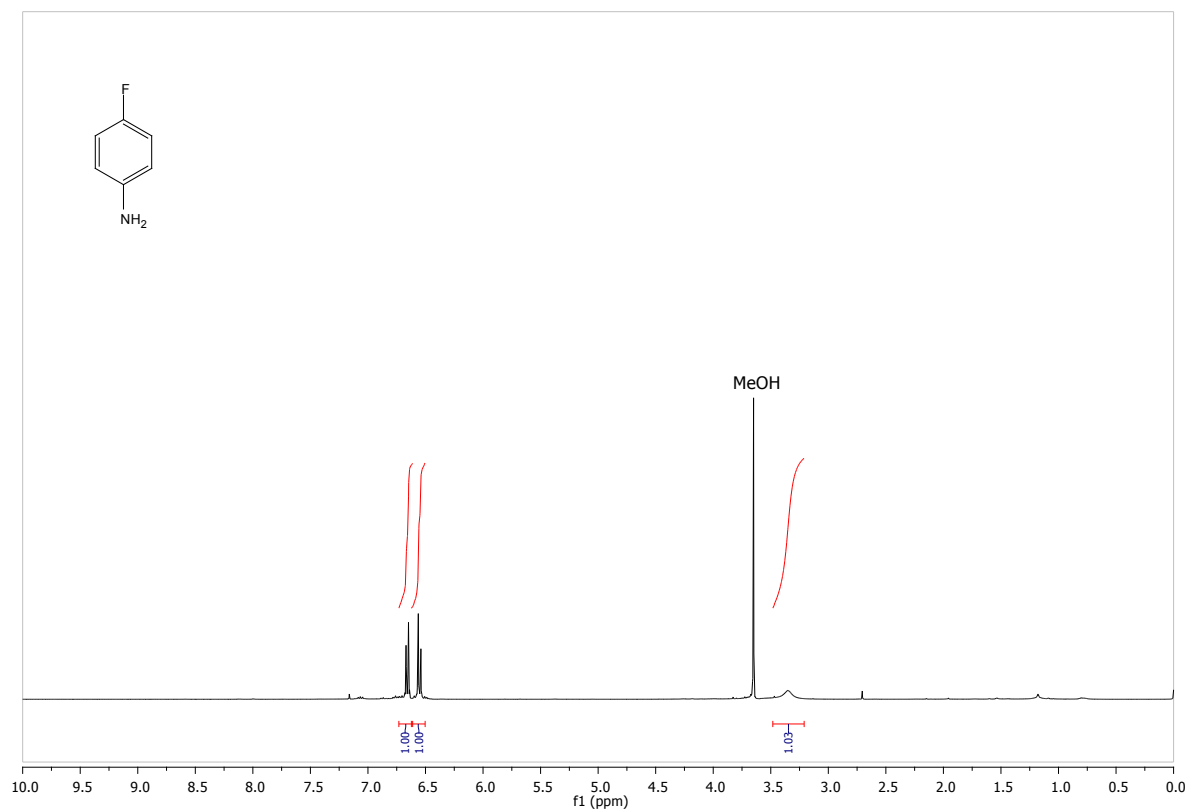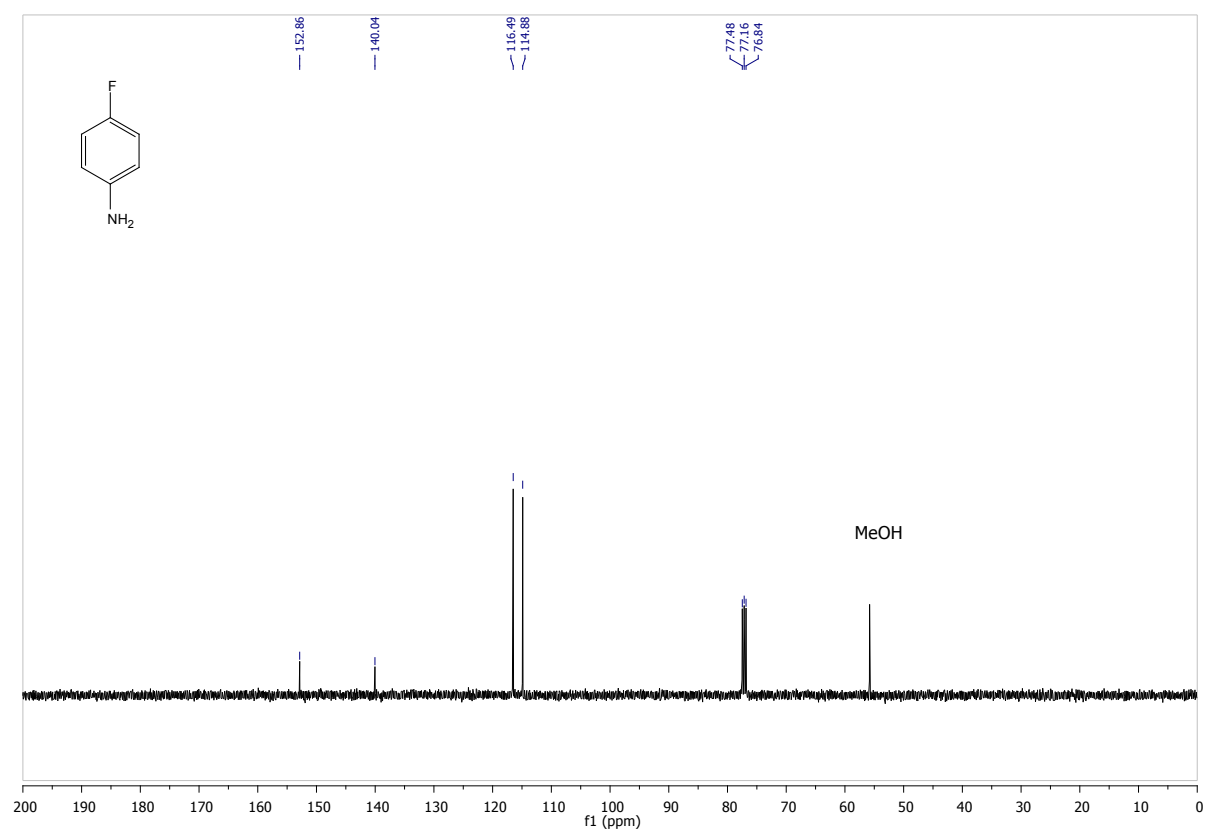

Figure S9.  $^1\text{H}$ -NMR (400 MHz) and  $^{13}\text{C}$ -NMR (100 MHz) spectrum of 2j ( $\text{CDCl}_3$ ).



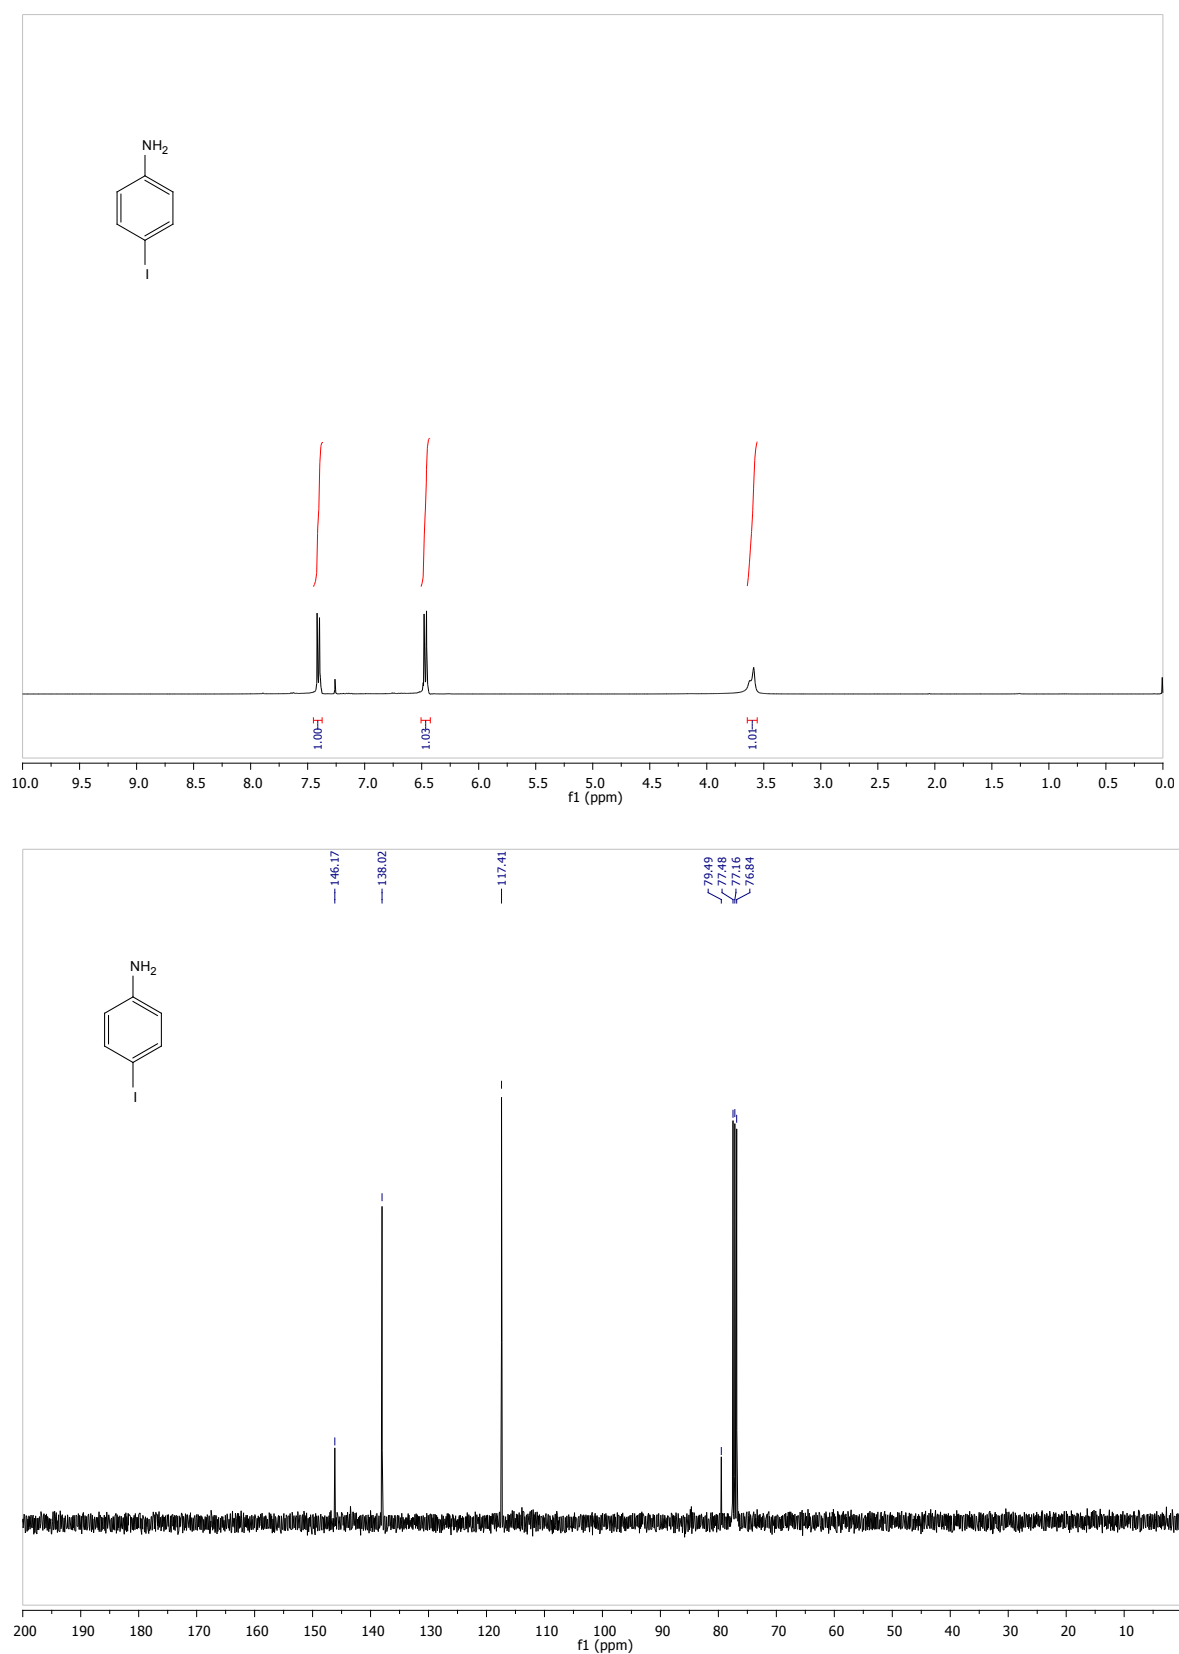

Figure S10. <sup>1</sup>H-NMR (400 MHz) and <sup>13</sup>C-NMR (100 MHz) spectrum of 2k (CDCl<sub>3</sub>).

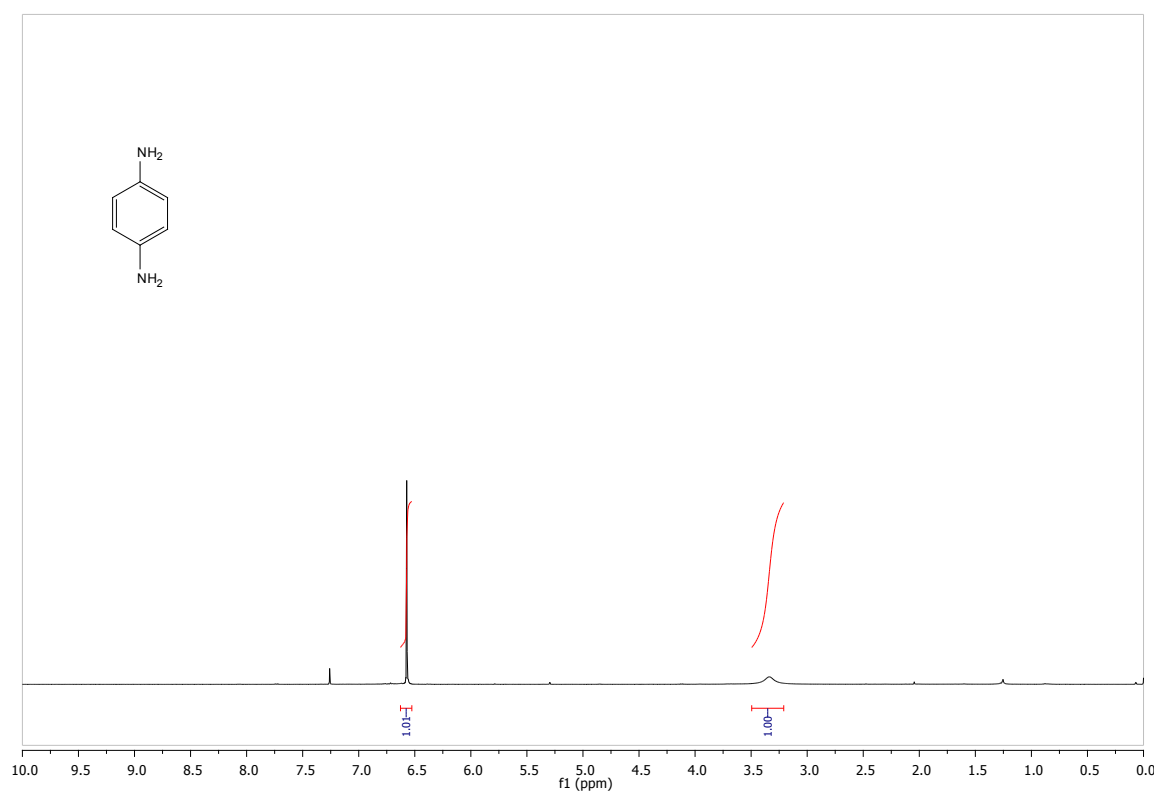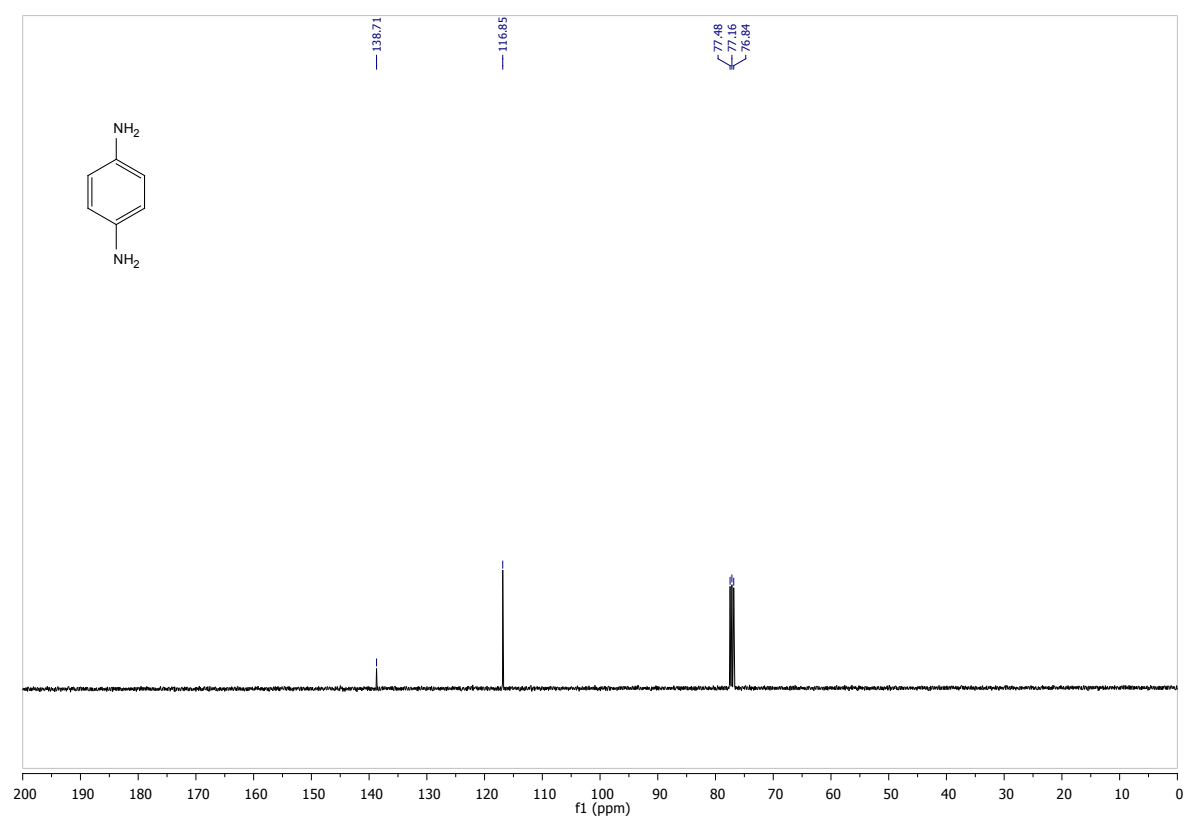

Figure S11.  $^1\text{H}$ -NMR (400 MHz) and  $^{13}\text{C}$ -NMR (100 MHz) spectrum of 2I ( $\text{CDCl}_3$ ).

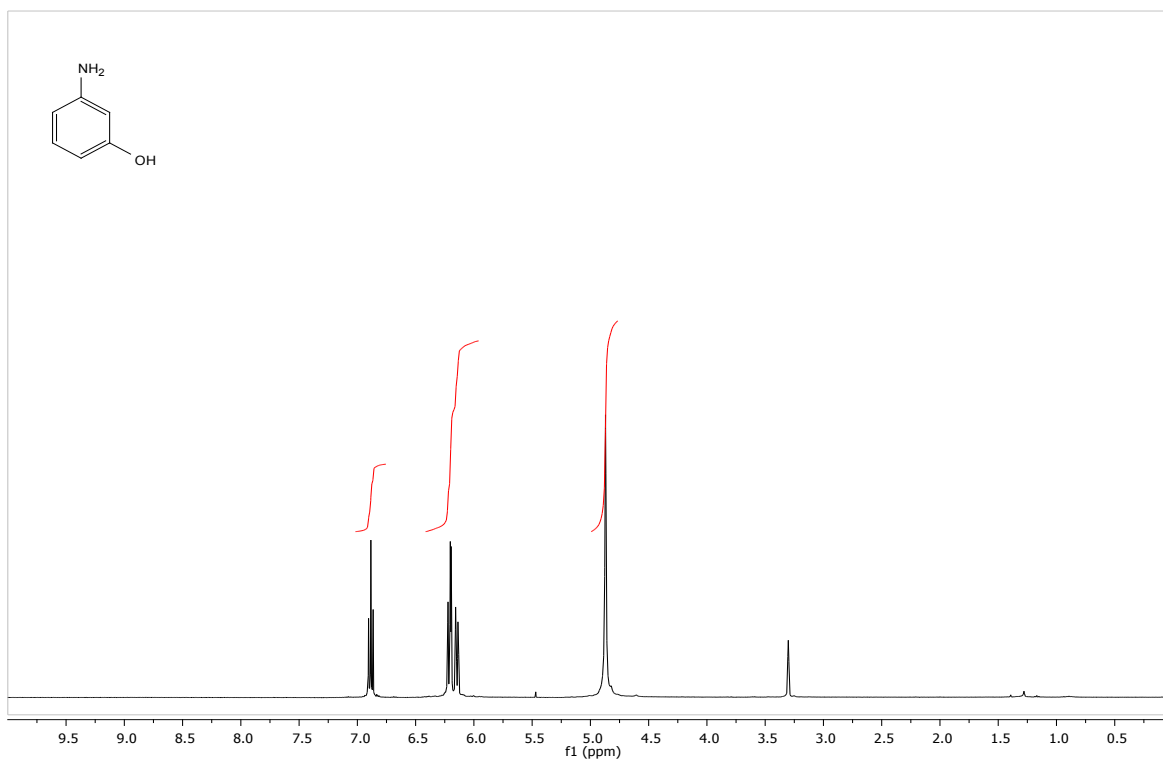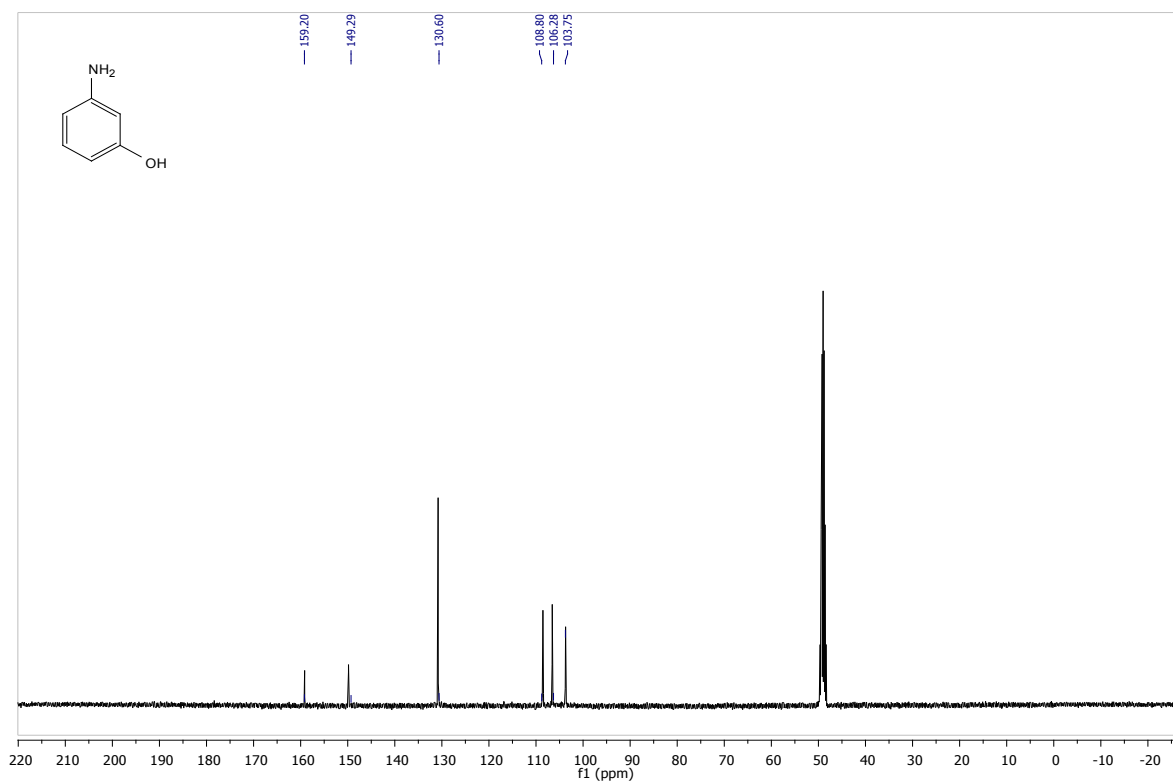

Figure S12. <sup>1</sup>H-NMR (400 MHz) and <sup>13</sup>C-NMR (100 MHz) spectrum of 2m (CD<sub>3</sub>OD).

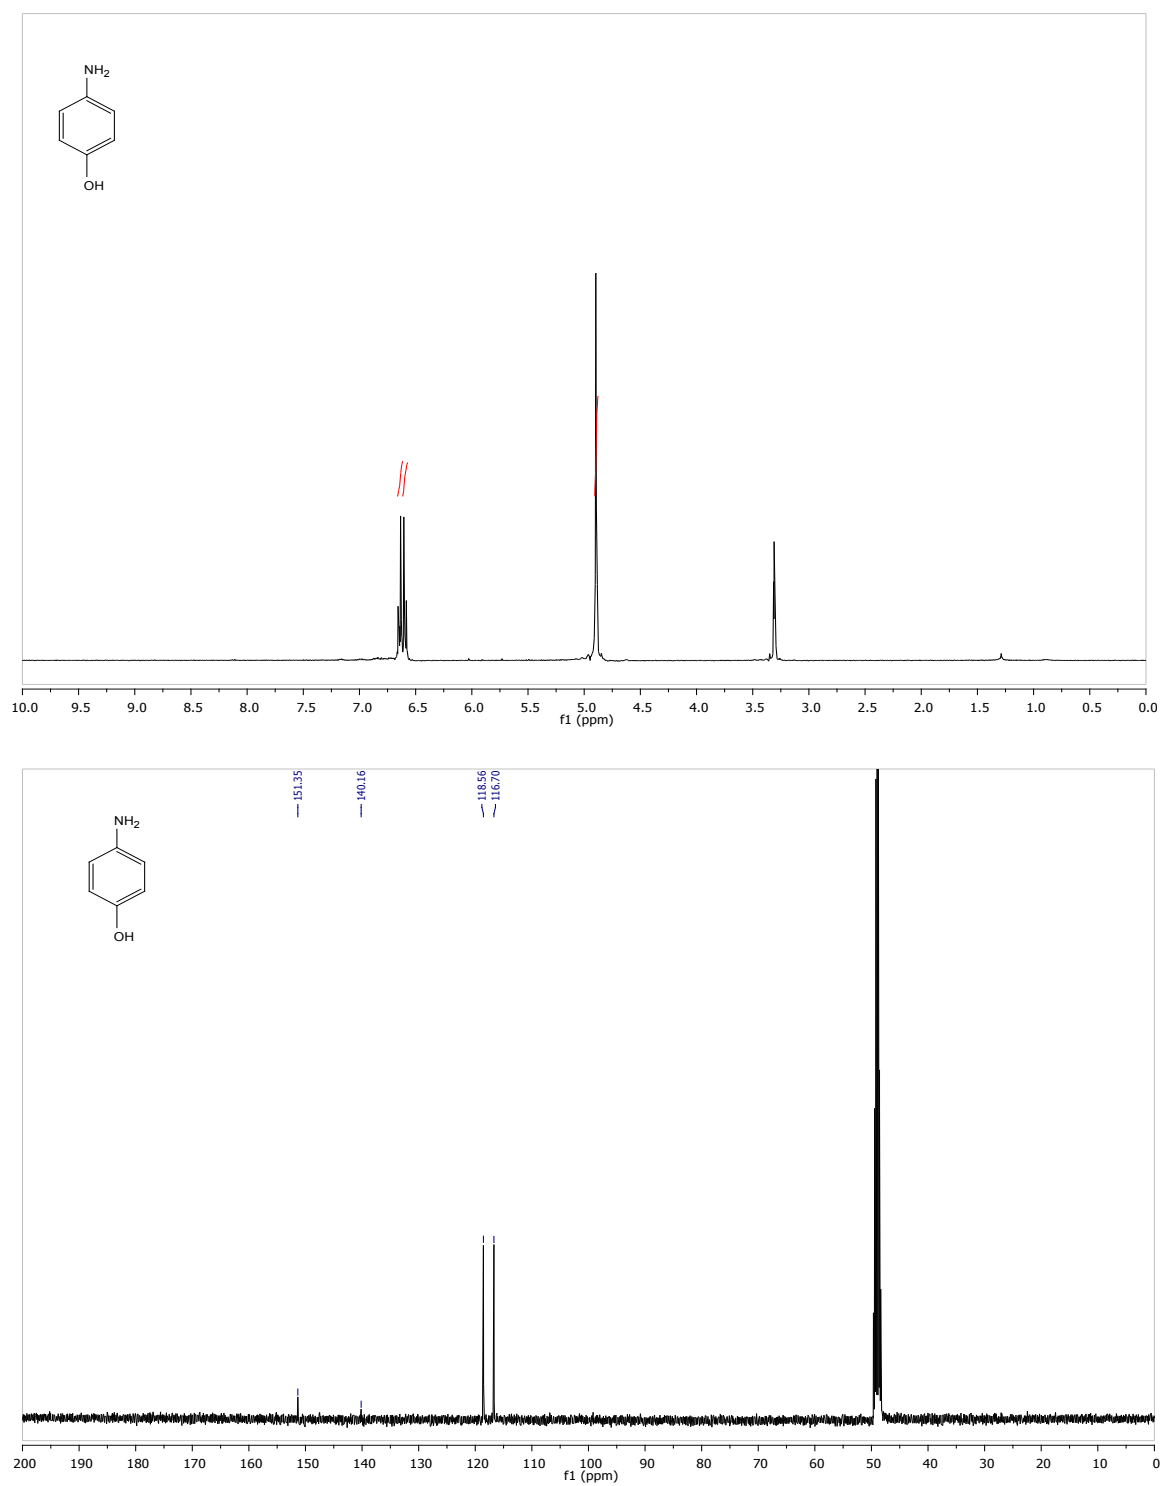

Figure S13.  $^1\text{H-NMR}$  (400 MHz) and  $^{13}\text{C-NMR}$  (100 MHz) spectrum of 2n ( $\text{CD}_3\text{OD}$ ).

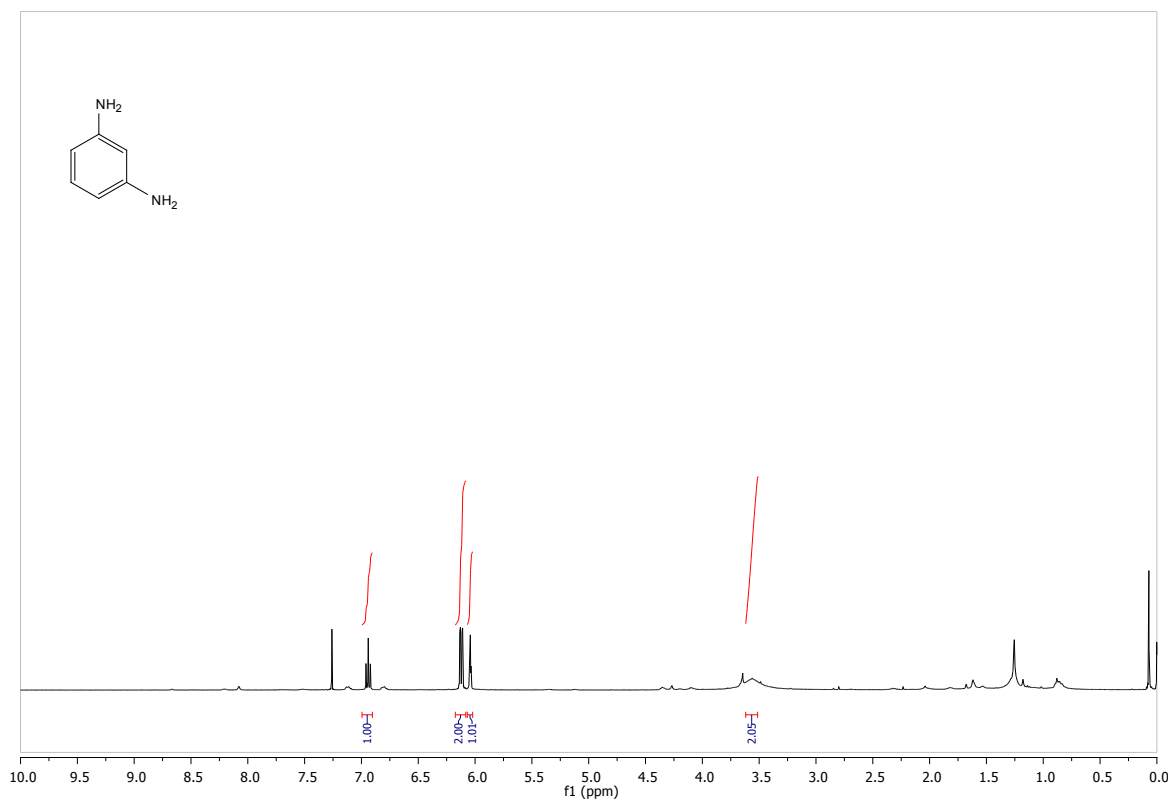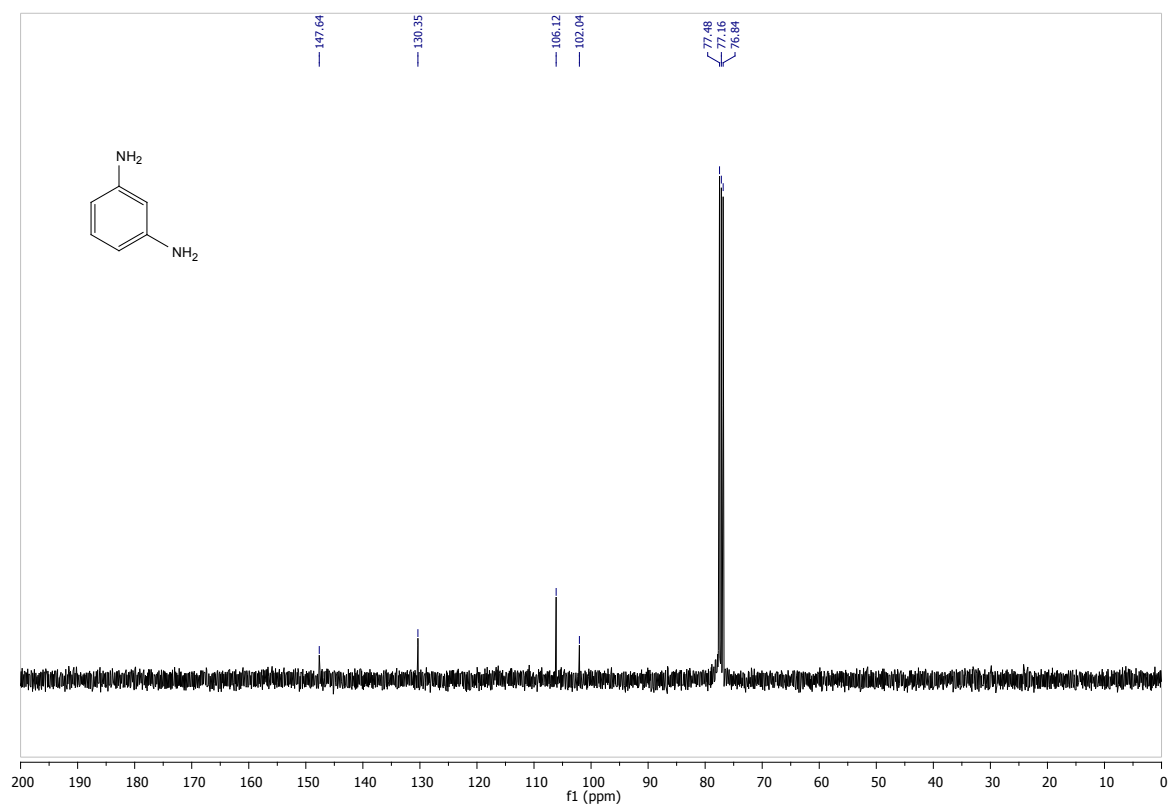

Figure S14.  $^1\text{H}$ -NMR (400 MHz) and  $^{13}\text{C}$ -NMR (100 MHz) spectrum of 2o ( $\text{CDCl}_3$ ).

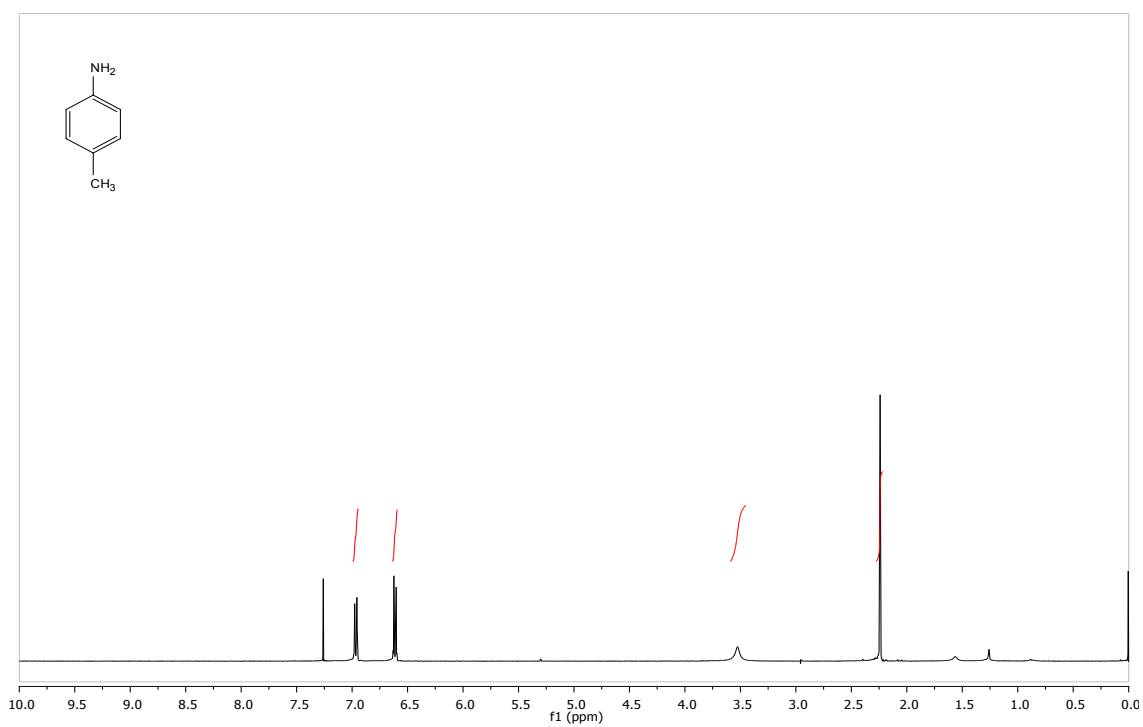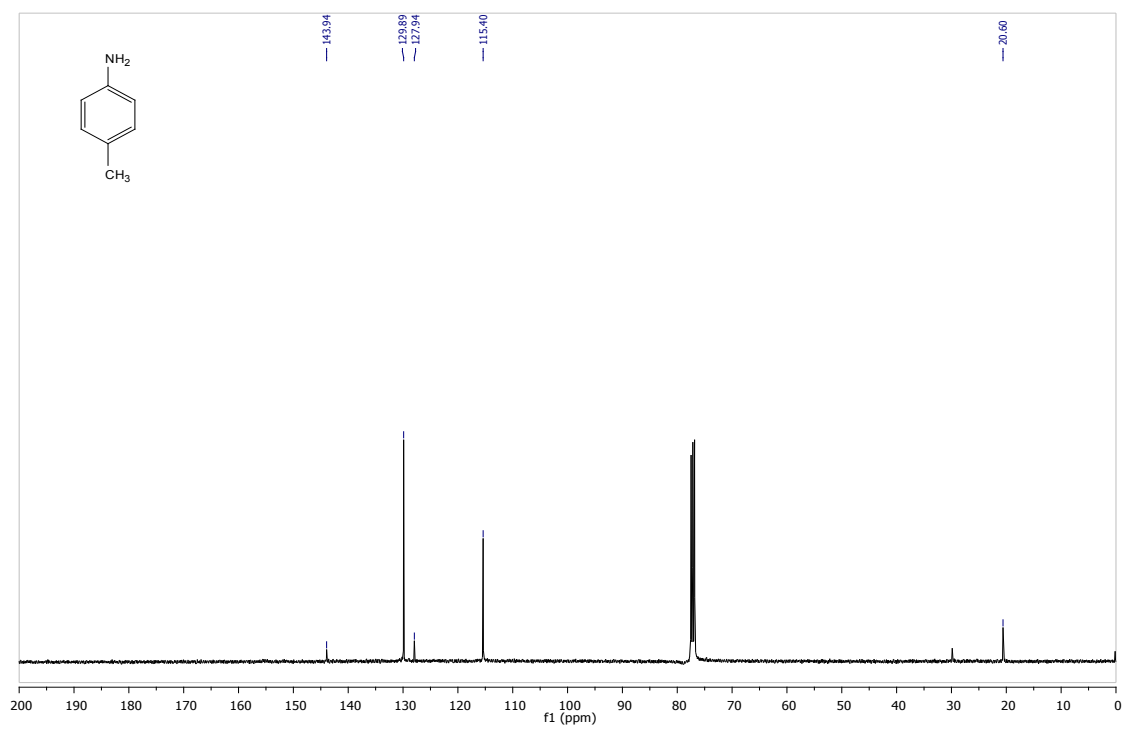

Figure S15.  $^1\text{H}$ -NMR (400 MHz) and  $^{13}\text{C}$ -NMR (100 MHz) spectrum of 2p ( $\text{CDCl}_3$ ).

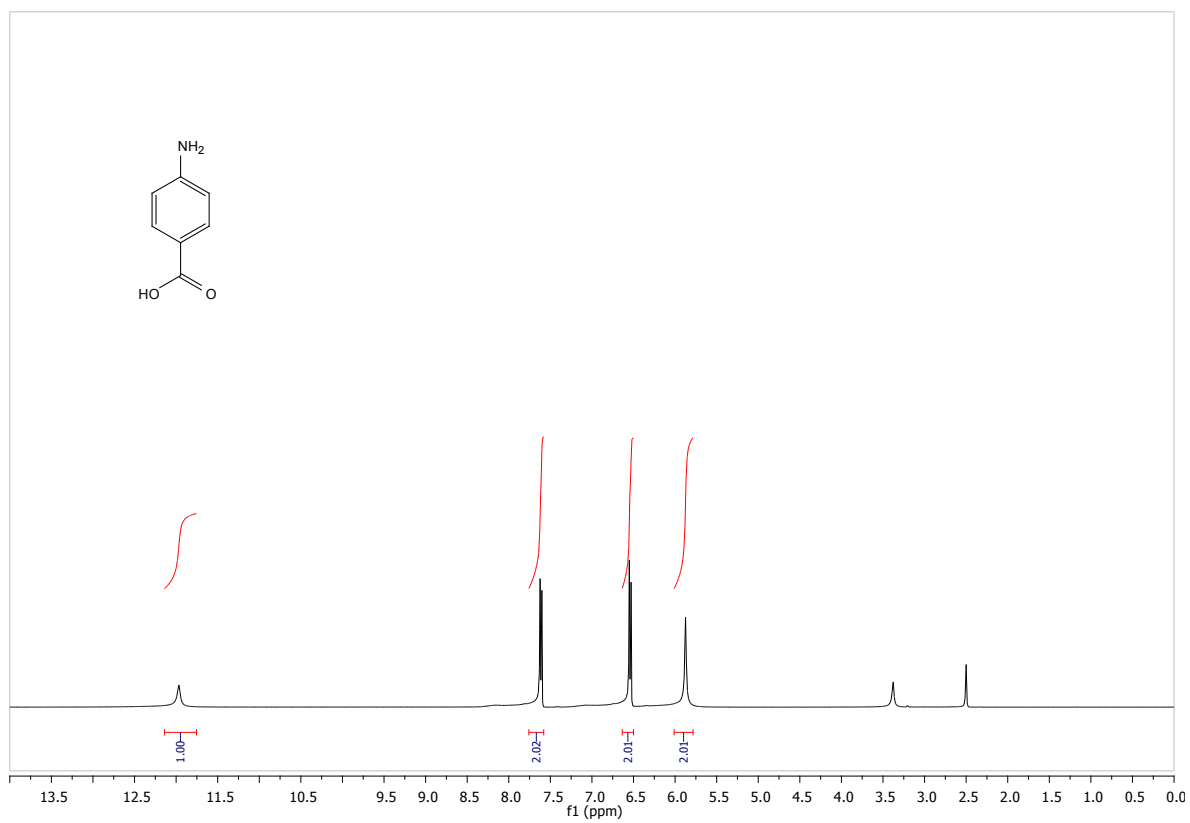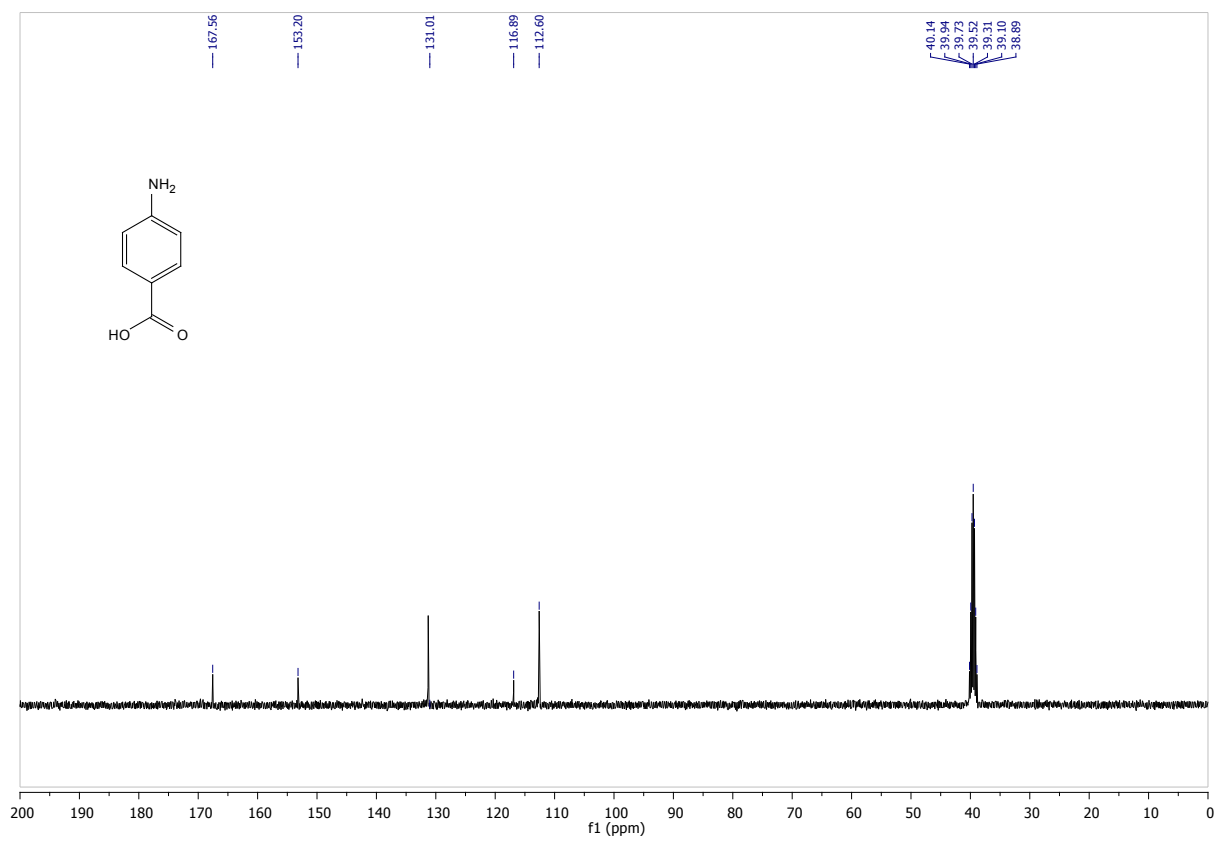

Figure S16. <sup>1</sup>H-NMR (400 MHz) and <sup>13</sup>C-NMR (100 MHz) spectrum of 2r (DMSO).

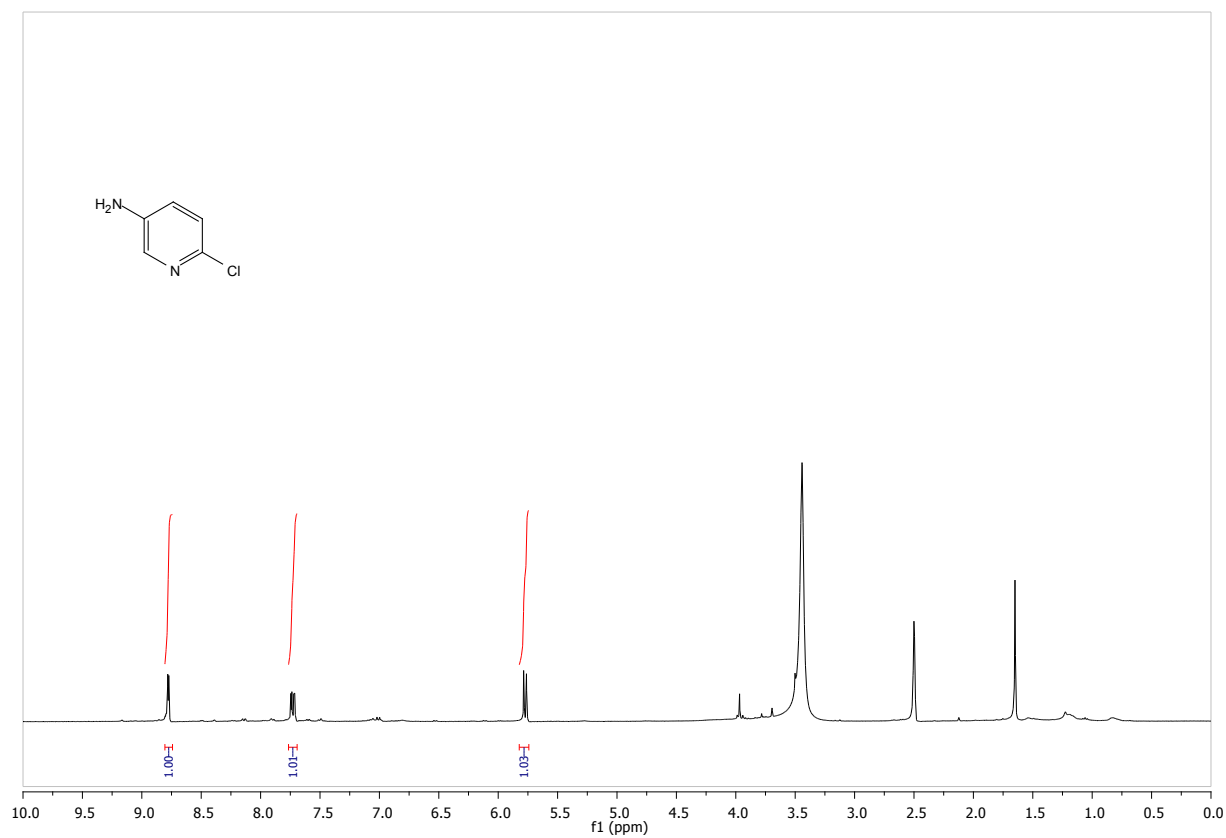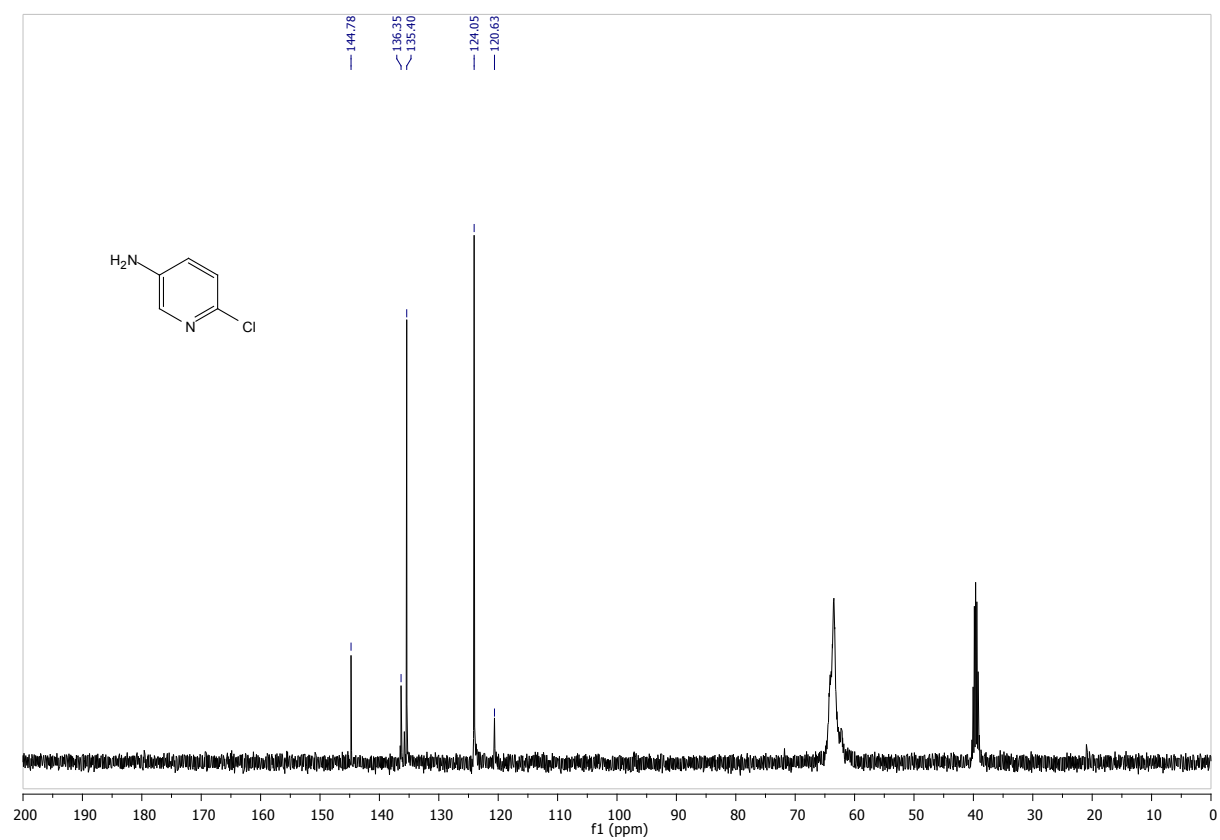

Figure S17.  $^1\text{H}$ -NMR (400 MHz) and  $^{13}\text{C}$ -NMR (100 MHz) spectrum of 2s (DMSO).



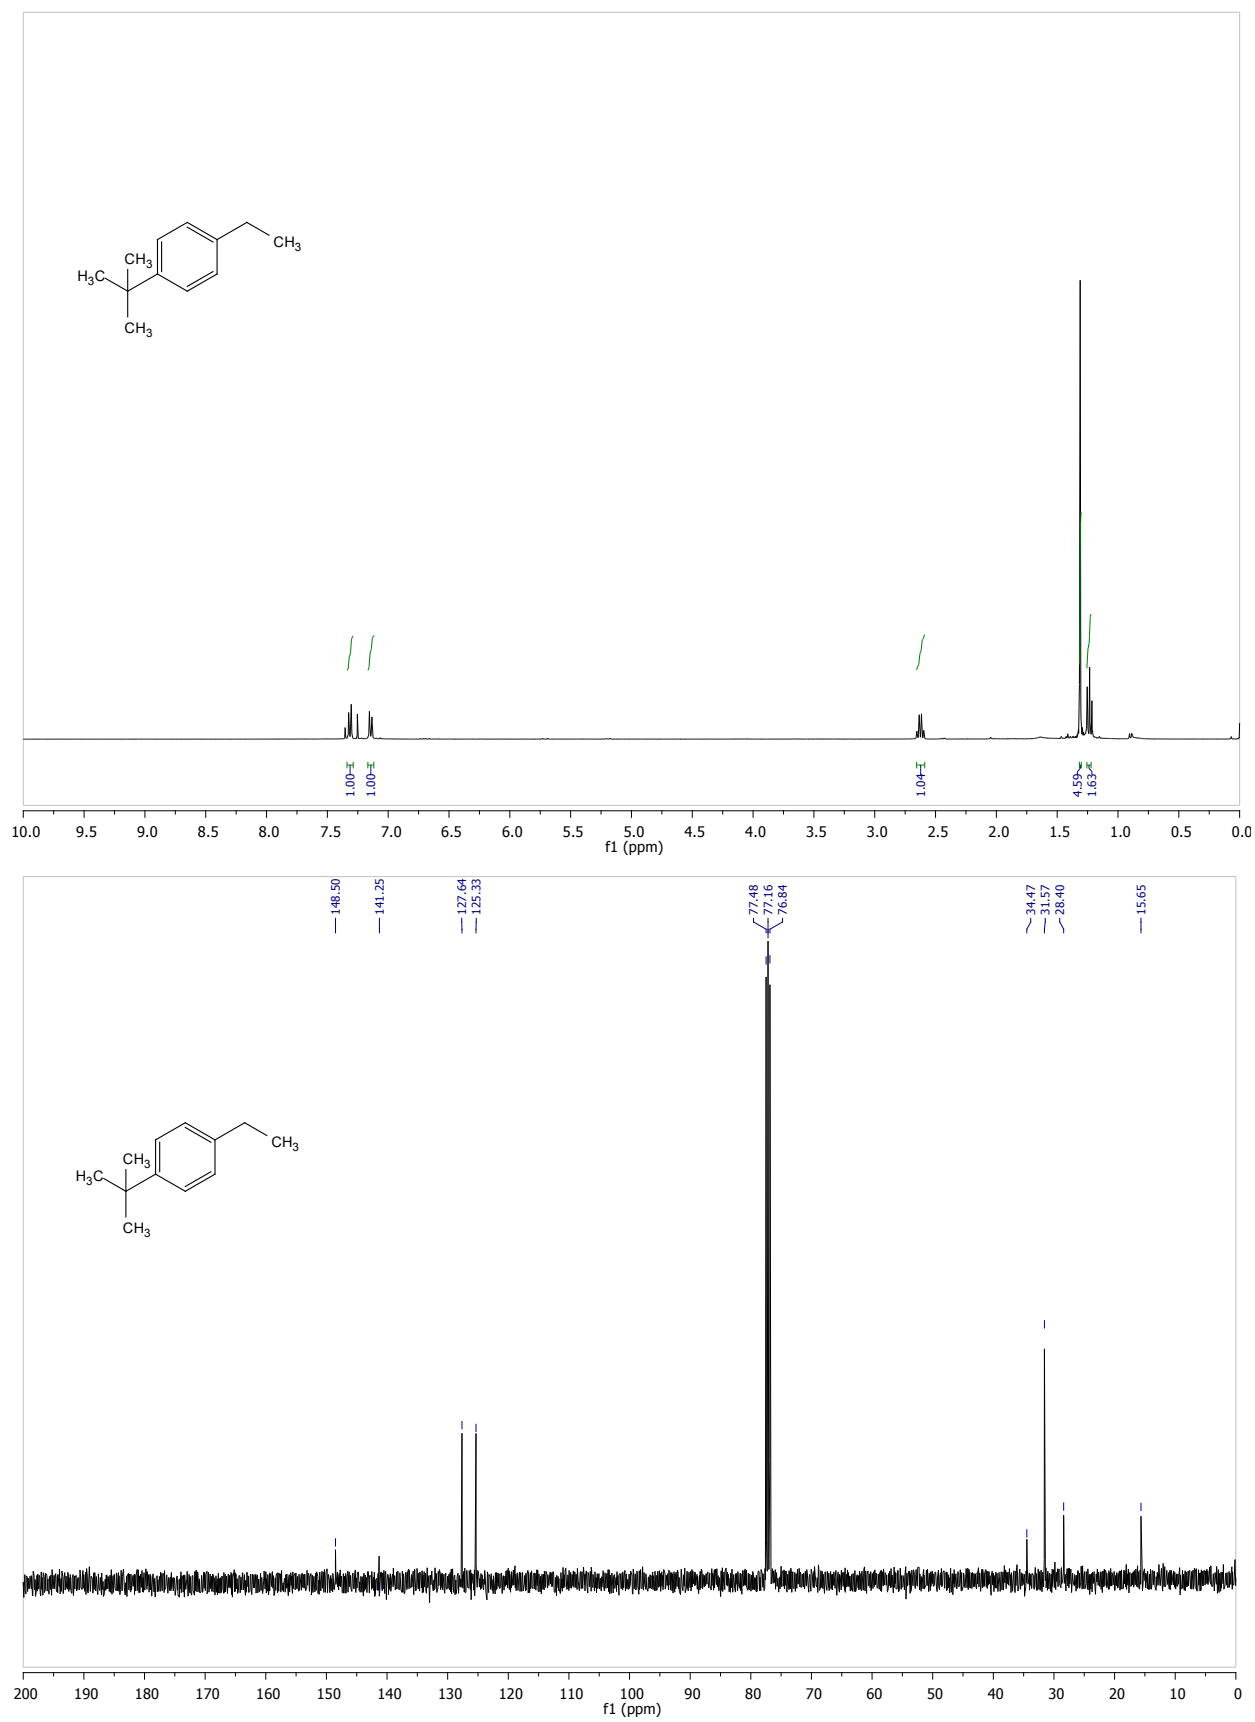

Figure S18. <sup>1</sup>H-NMR (400 MHz) and <sup>13</sup>C-NMR (100 MHz) spectrum of 4a (CDCl<sub>3</sub>).

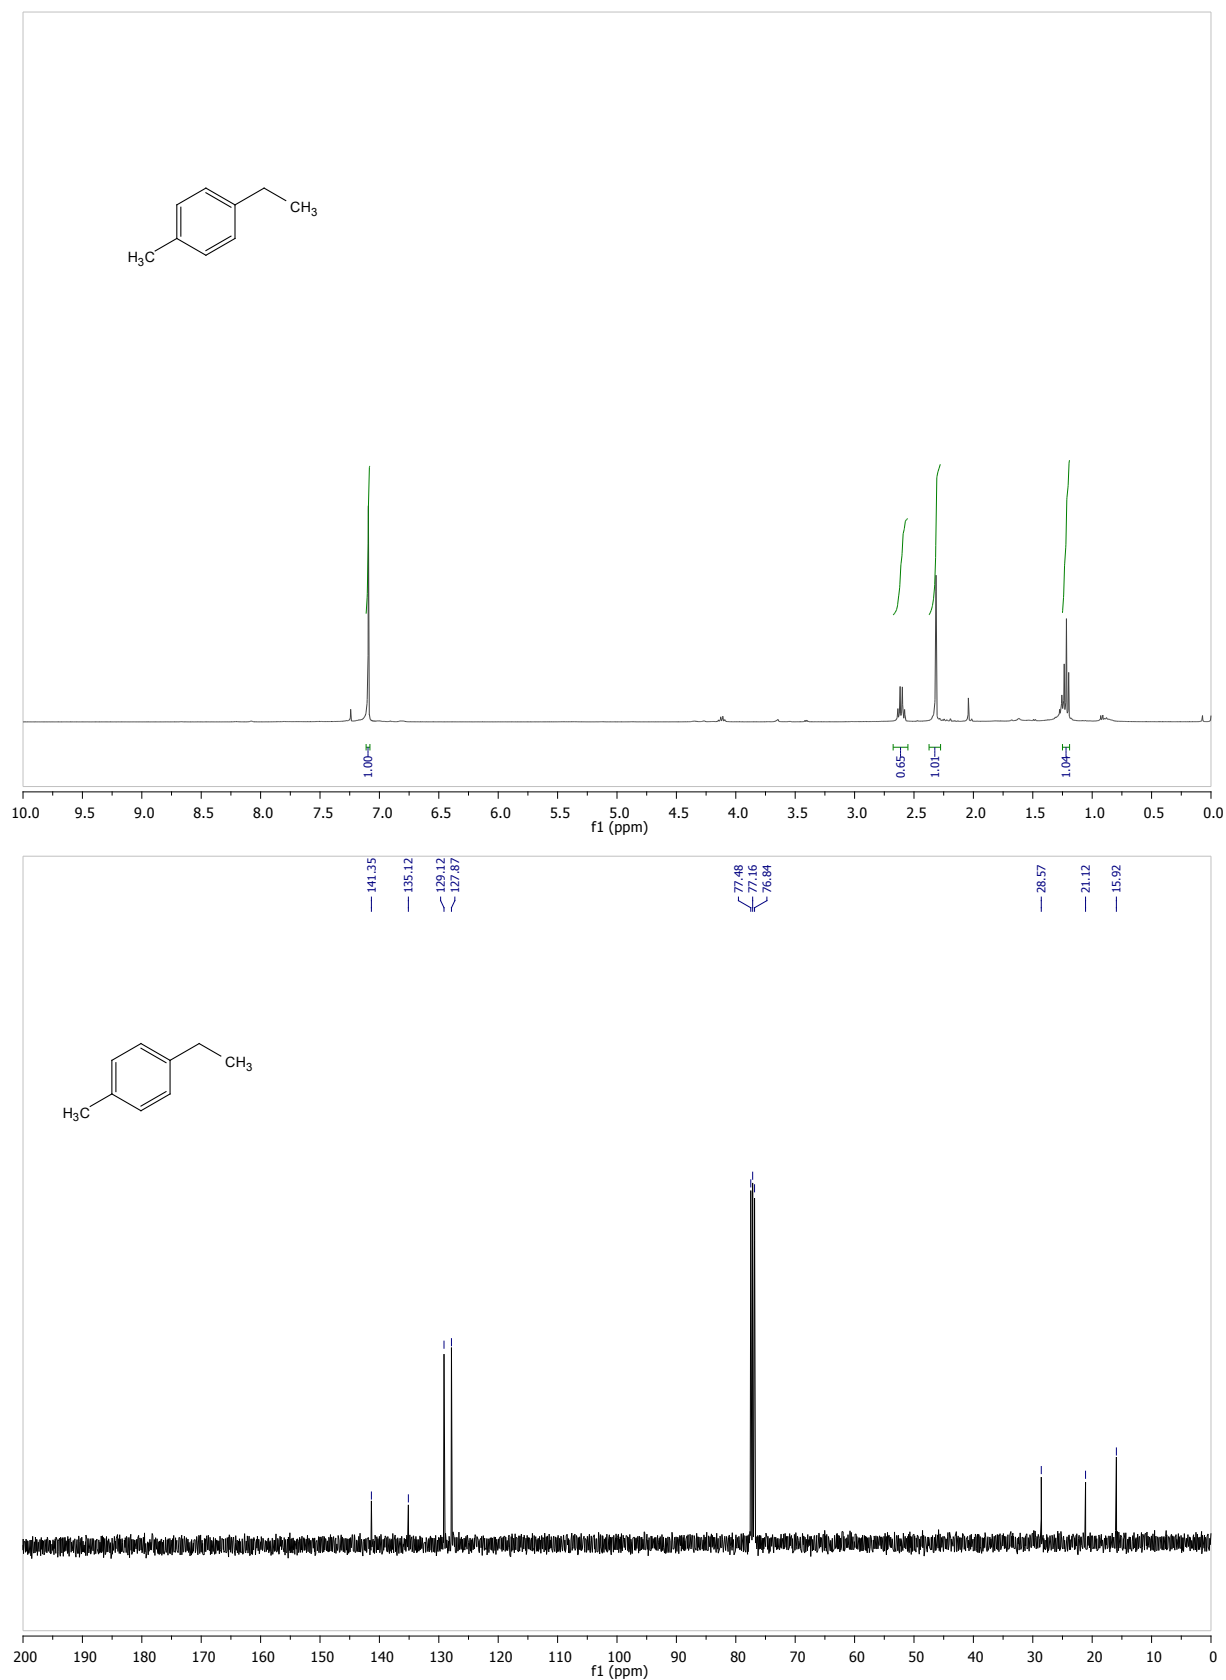

Figure S19. <sup>1</sup>H-NMR (400 MHz ) and <sup>13</sup>C-NMR (100 MHz ) spectrum of 4b (CDCl<sub>3</sub>).

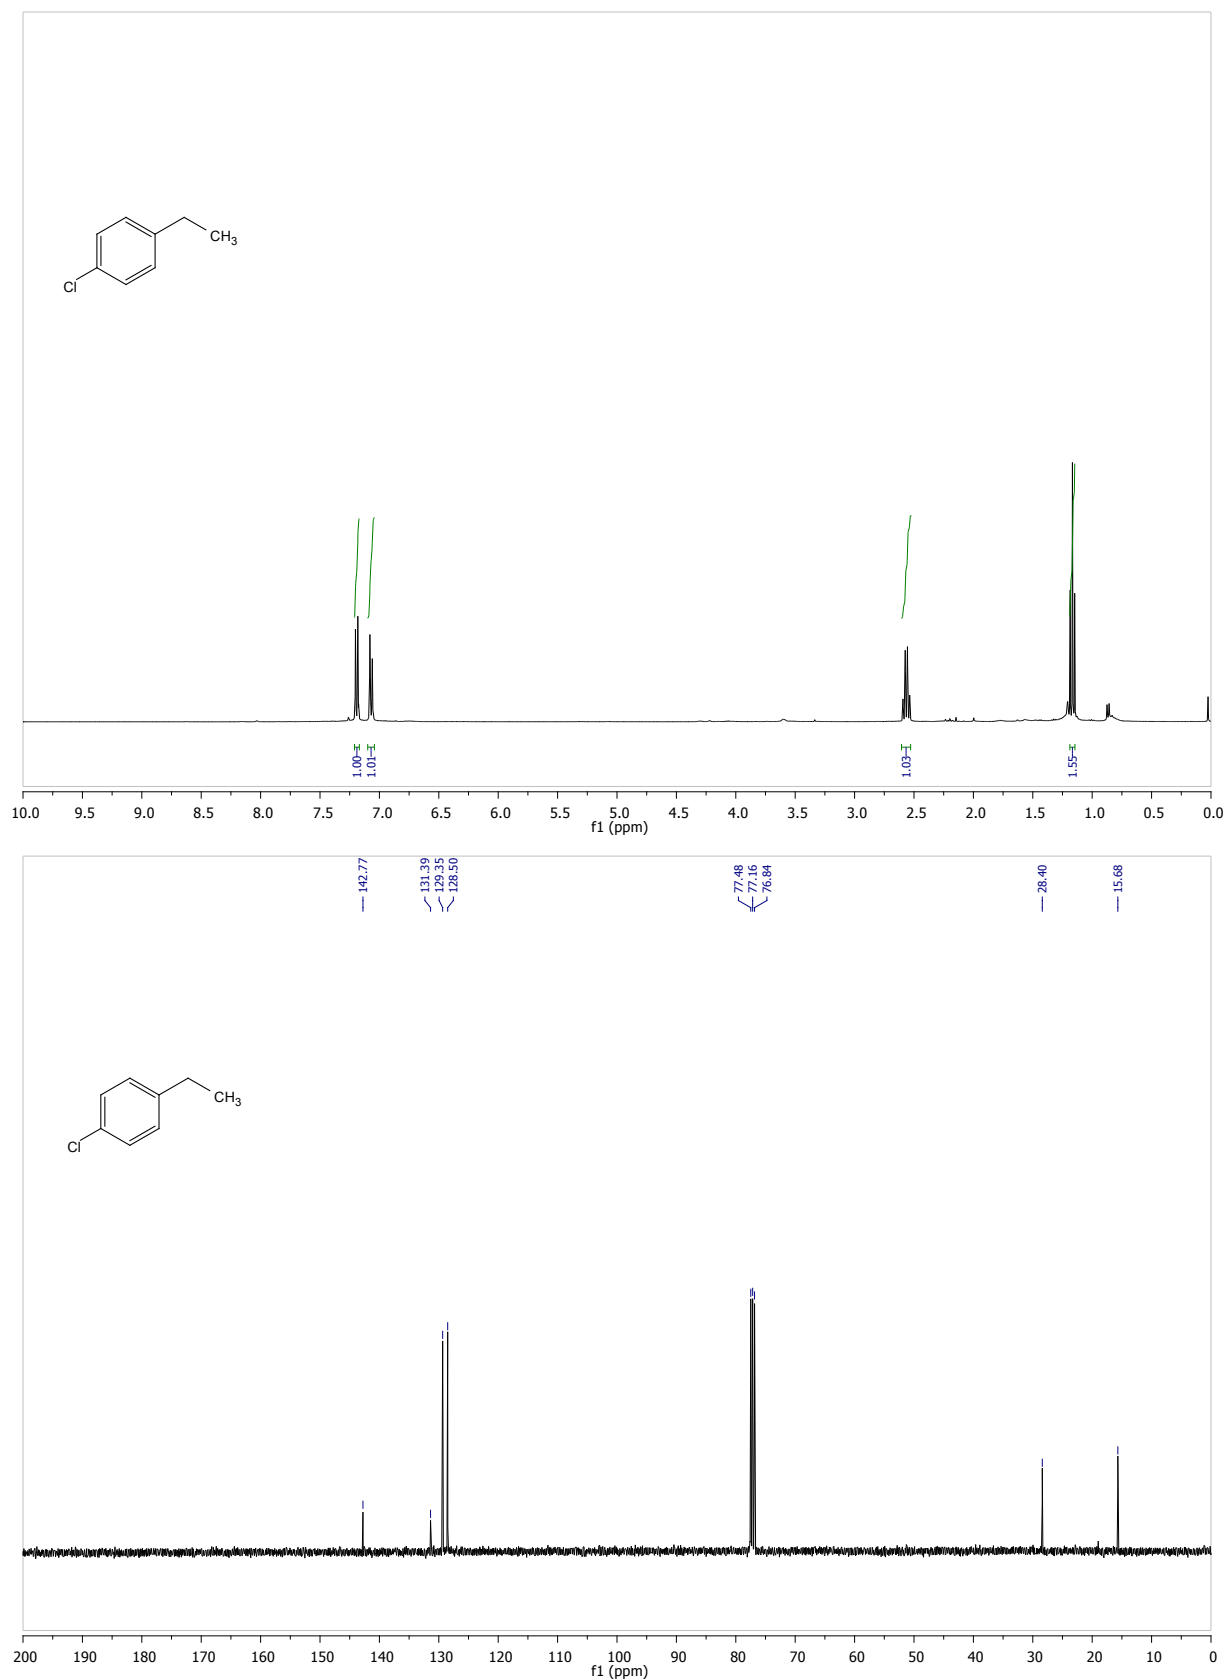

Figure S20. <sup>1</sup>H-NMR (400 MHz) and <sup>13</sup>C-NMR (100 MHz) spectrum of 4c (CDCl<sub>3</sub>).

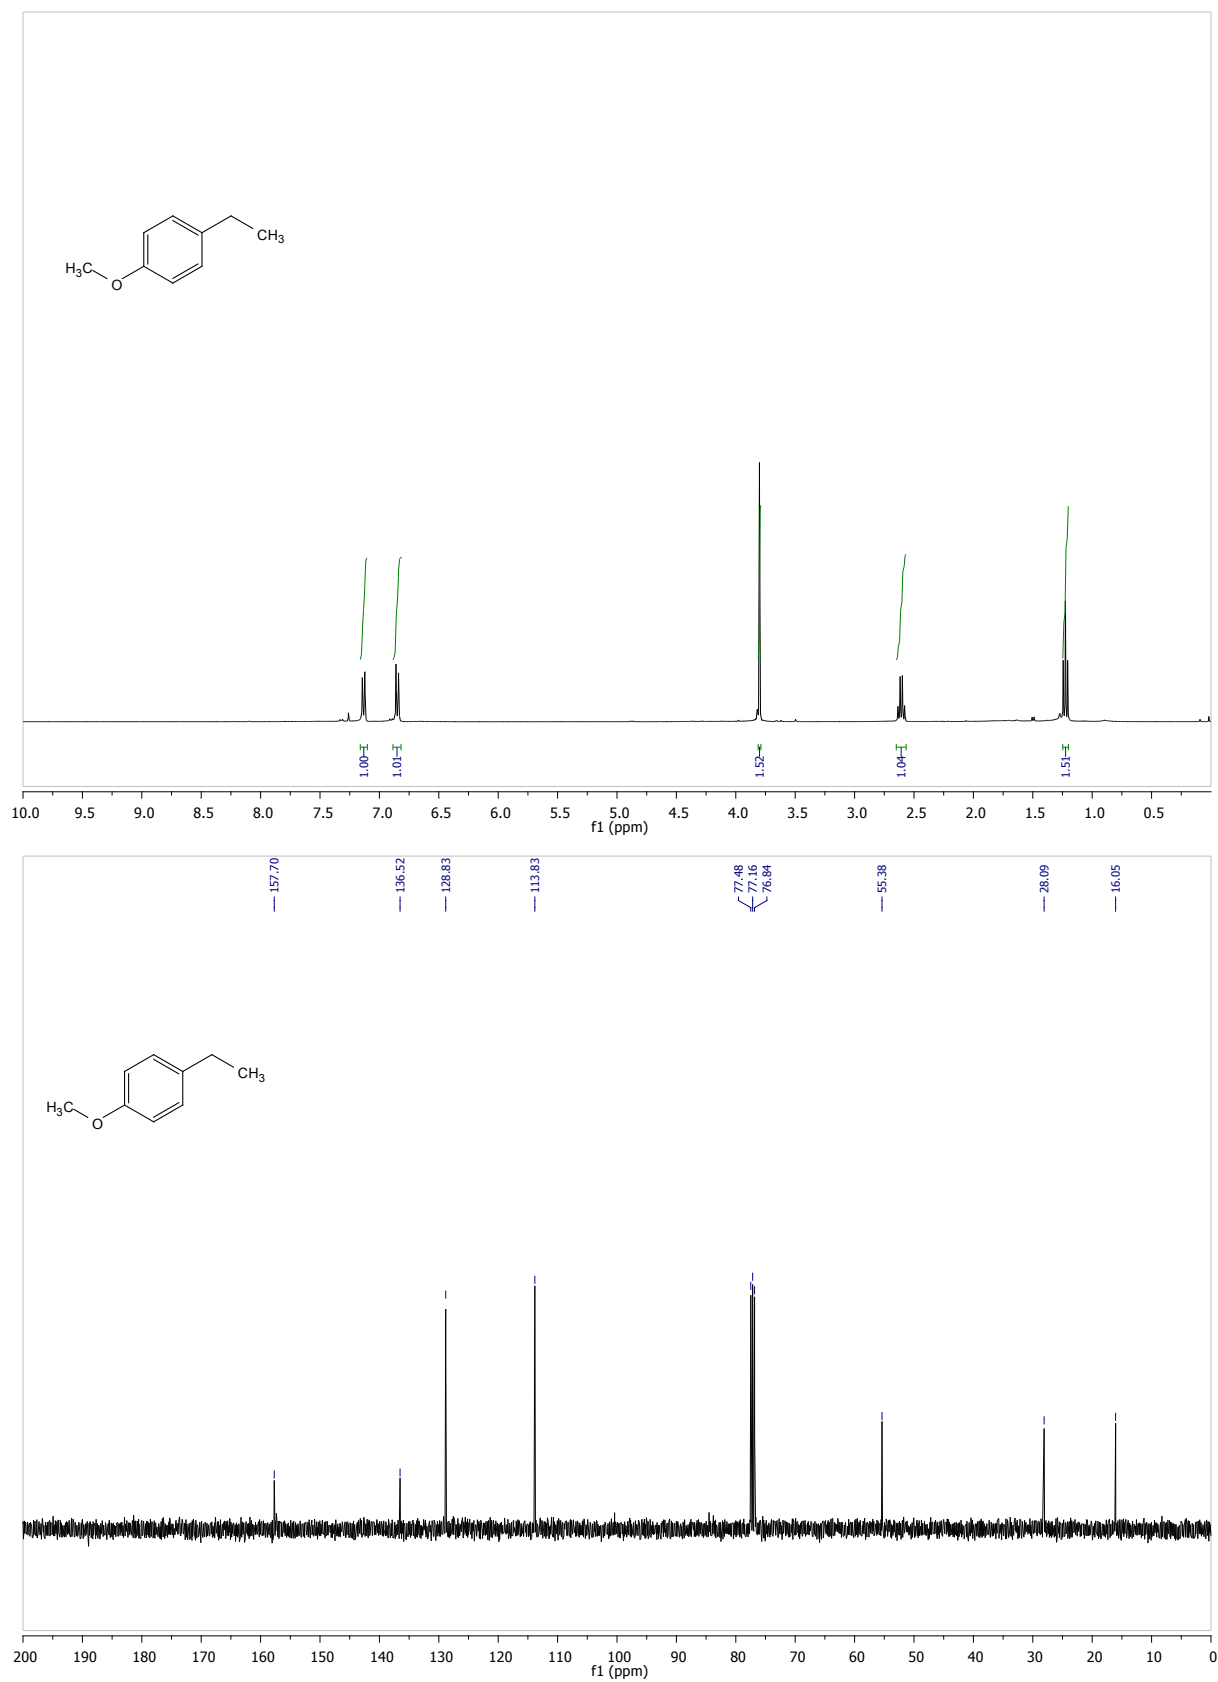

Figure S21. <sup>1</sup>H-NMR (400 MHz) and <sup>13</sup>C-NMR (100 MHz) spectrum of 4d (CDCl<sub>3</sub>).

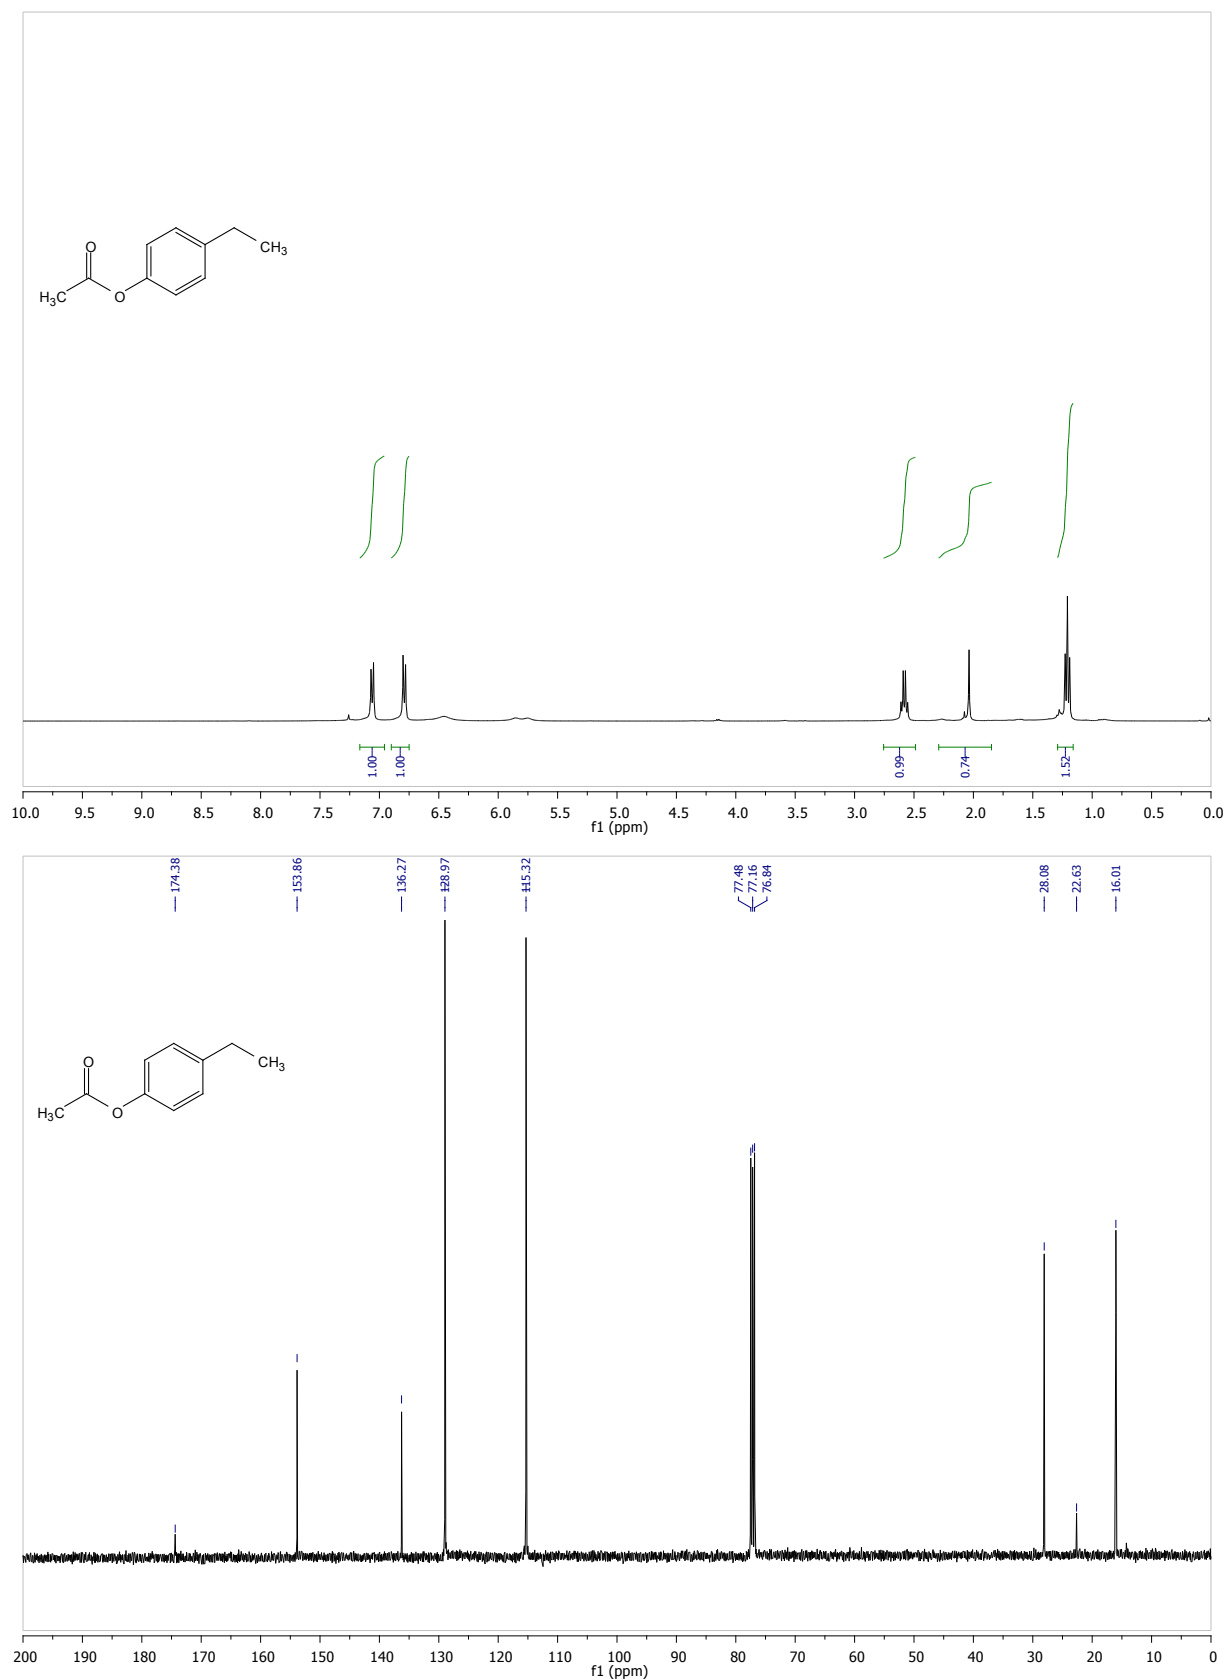

Figure S22. <sup>1</sup>H-NMR (400 MHz) and <sup>13</sup>C-NMR (100 MHz) spectrum of 4e (CDCl<sub>3</sub>).

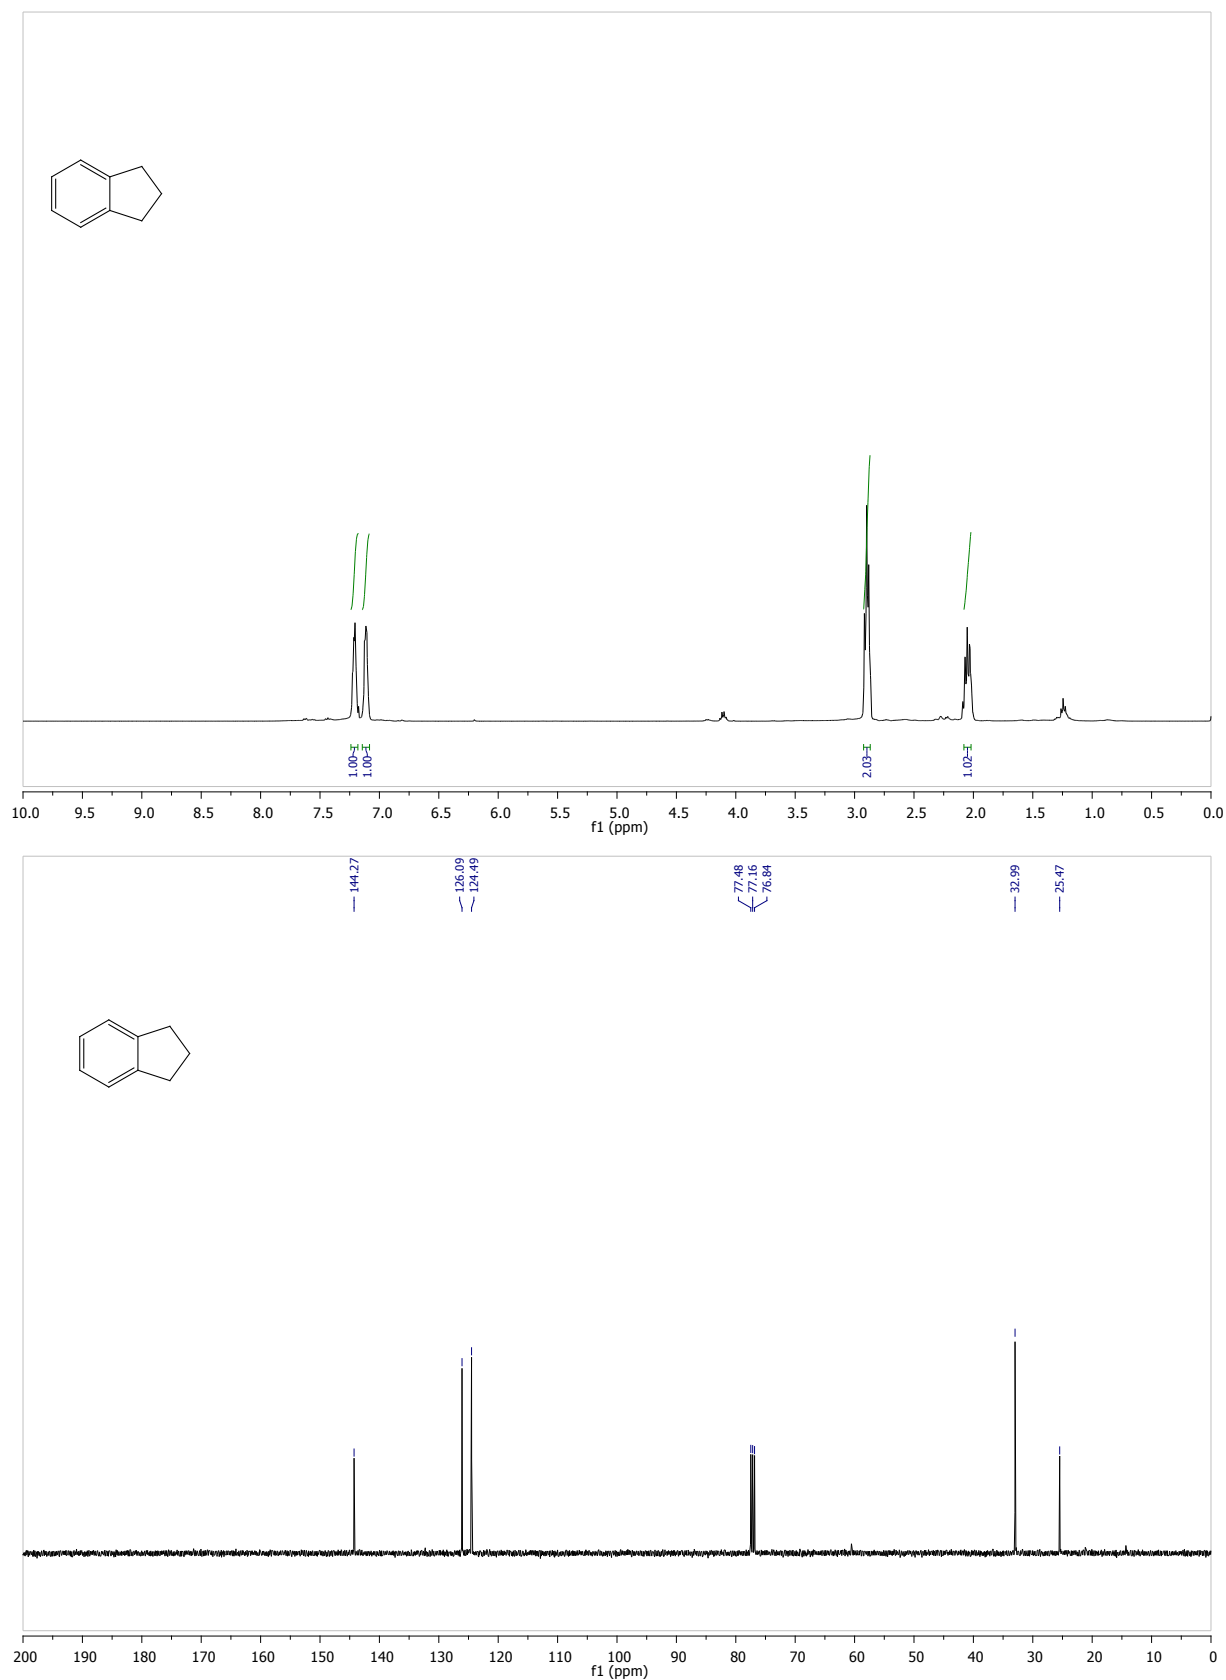

Figure S23. <sup>1</sup>H-NMR (400 MHz) and <sup>13</sup>C-NMR (100 MHz) spectrum of 4f (CDCl<sub>3</sub>).

## <sup>1</sup>H-NMR and <sup>13</sup>C-NMR chemical shifts of the yielded products

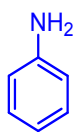

<sup>1</sup>H NMR (CDCl<sub>3</sub>, 400 MHz): δ (ppm) = 7.17 (t, 2H, J= 8.0 Hz), 6.76 (t, 1H, J= 8.0 Hz), 6.68 (d, 2H, J= 8.0 Hz), 3.64 (s, 2H). <sup>13</sup>C-NMR(CDCl<sub>3</sub>, 100 MHz): δ 146.49, 129.43, 118.70, 115.24.

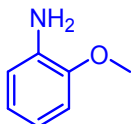

<sup>1</sup>H NMR (400 MHz, CDCl<sub>3</sub>): δ 6.82-6.71 (m, 4H), 3.85 (s, 3H), 3.80 (s br, 2H). <sup>13</sup>C NMR (100 MHz): δ 147.46, 136.27, 121.21, 118.62, 115.16, 110.56, 55,56.

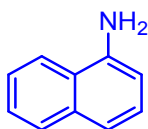

<sup>1</sup>H NMR (CDCl<sub>3</sub>, 400 MHz): δ (ppm) = 7.70-7.67 (m, 2H), 7.37-7.31 (m, 2H), 7.22-7.16 (m, 2H), 6.66-6.64 (m, 1H), 4.00 (s, 2H). <sup>13</sup>C-NMR(CDCl<sub>3</sub>, 100 MHz): δ 142.16, 134.48, 128.64, 126.43, 125.94, 124.94, 123.74, 120.89, 119.06, 109.78.

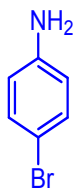

<sup>1</sup>H NMR (CDCl<sub>3</sub>, 400 MHz): δ (ppm) = 7.22(d, 2H, J= 8 Hz), 6.55 (d, 2H, J= 8 Hz), 3.64 (s, 2H). <sup>13</sup>C-NMR(CDCl<sub>3</sub>, 100 MHz): δ 145.52, 132.10, 116.81, 110.27.

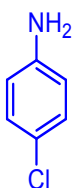

<sup>1</sup>H NMR (CDCl<sub>3</sub>, 400 MHz): δ (ppm) = 7.27 (d, 2H, J= 8 Hz), 6.65 (d, 2H, J= 8 Hz), 3.58 (s, 2H). <sup>13</sup>C-NMR(CDCl<sub>3</sub>, 100 MHz): δ 145.08, 129.23, 123.29, 116.36.

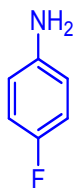

<sup>1</sup>H NMR (CDCl<sub>3</sub>, 400 MHz): δ (ppm) = 6.67-6.65 (m, 2H), 6.56-6.54 (m, 2H), 3.36 (s, 2H). <sup>13</sup>C-NMR(CDCl<sub>3</sub>, 100 MHz): δ 152.86,140.04, 116,49, 114.88.

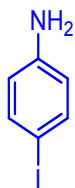

**$^1\text{H NMR}$  ( $\text{CDCl}_3$ , 400 MHz):**  $\delta$  (ppm) = 7.40 (d,  $J$  = 8 Hz 2H), 6.46(d,  $J$  = 8 Hz 2H), 3.58 (s, 2H).  **$^{13}\text{C-NMR}$ ( $\text{CDCl}_3$ , 100 MHz):**  $\delta$ , 146.17, 138.02, 117.41, 79.49.

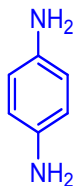

**$^1\text{H NMR}$  ( $\text{CDCl}_3$ , 400 MHz):**  $\delta$  (ppm) = 6.57 (s, 4H), 3.34 (s, 4H) . **$^{13}\text{C-NMR}$ ( $\text{CDCl}_3$ , 100 MHz):**  $\delta$  138.71, 116.85.

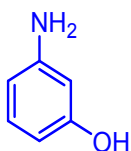

**$^1\text{H NMR}$ : (400 MHz,  $\text{CD}_3\text{OD}$ )  $\delta$  (ppm):** 4.44 (s, 2H), 6.39 (d, 1H,  $J$ =7.43 Hz), 6.52-6.64 (3H, m).  **$^{13}\text{C NMR}$  ( $\text{CD}_3\text{OD}$  100 MHz)**  $\delta$  159.20, 149.29, 130.60, 108.80, 106.28, 103.75.

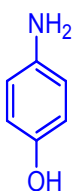

**$^1\text{H NMR}$  (400 MHz,  $\text{CD}_3\text{OD}$ ):**  $\delta$ (ppm): 6.65 – 6.53 (m, 4H).  **$^{13}\text{C-NMR}$ ( $\text{CD}_3\text{OD}$ , 100 MHz):**  $\delta$  151.35, 140.16, 118.56, 116.70.

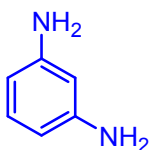

**$^1\text{H NMR}$  ( $\text{CDCl}_3$ , 400 MHz)**  $\delta$  6.94 (t,  $J$  = 7.8 Hz, 1 H), 6.12 (dd,  $J$  = 7.8, 2.2 Hz, 1 H), 6.04 (t,  $J$  = 7,8 Hz, 1 H), 3.56 (s, 4 H);  **$^{13}\text{C NMR}$  (100 MHz)**  $\delta$  147.64, 130.35, 106.12, 102.04

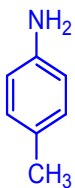

**$^1\text{H NMR}$  ( $\text{CDCl}_3$ , 400 MHz):**  $\delta$  (ppm) = 7.0 (d, 2H,  $J$  = 8 Hz), 6.64 (d, 2H,  $J$  = 8 Hz), 3.52 (s, 2H), 2.26 (s, 3H).  **$^{13}\text{C-NMR}$ ( $\text{CDCl}_3$ , 100 MHz):**  $\delta$  143.94, 129.89, 127.94, 115.40, 20.60.



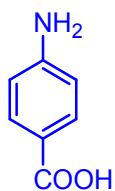

$^1\text{H NMR}$  (400 MHz, DMSO)  $\delta$  11.97(bs, 1H), 7.61 (d,  $J$  = 8.5 Hz, 2H), 6.54 (d,  $J$  = 8.5 Hz, 2H), 3.38 (bs, 2H).  $^{13}\text{C NMR}$  (100 MHz, DMSO):  $\delta$  167.56, 153.20, 131.01, 116.89, 112.60.

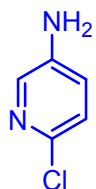

$^1\text{H NMR}$  (400 MHz, DMSO)  $\delta$  8.78 (d,  $J$  = 3.4 Hz, 1H), 7.73 (dd,  $J$  = 9.5, 3.4 Hz, 1H), 5.77 (d,  $J$  = 9.5 Hz, 1H).  $^{13}\text{C NMR}$  (100 MHz, DMSO):  $\delta$  144.78, 136.35, 135.40, 124.05, 120.63.

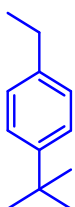

$^1\text{H NMR}$  (400 MHz,  $\text{CDCl}_3$ )  $\delta$  7.31 (d,  $J$  = 8.2 Hz, 2H), 7.14 (d,  $J$  = 8.2 Hz, 2H), 2.64 (q,  $J$  = 7.6 Hz, 2H), 1.31 (s, 9H), 1.25 (t,  $J$  = 7.6 Hz, 3H).  $^{13}\text{C NMR}$  (100 MHz,  $\text{CDCl}_3$ )  $\delta$  148.5, 141.2, 127.6, 125.3, 34.4, 31.5, 28.4, 15.6;

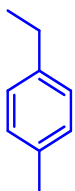

$^1\text{H NMR}$  (400 MHz,  $\text{CDCl}_3$ )  $\delta$  7.13 (s, 4H), 2.61 (q,  $J$  = 7.6 Hz, 2H), 2.26 (s, 3H), 1.28 (t,  $J$  = 7.6 Hz, 3H).  $^{13}\text{C-NMR}$  ( $\text{CDCl}_3$ , 100 MHz)  $\delta$  141.3, 135.1, 129.1, 127.8, 28.5, 21.1, 15.9;

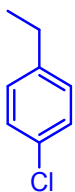

$^1\text{H NMR}$  (400 MHz,  $\text{CDCl}_3$ )  $\delta$  7.20 (d,  $J$  = 8.4 Hz, 2H), 7.08 (d,  $J$  = 8.4 Hz, 2H), 2.56 (q,  $J$  = 7.6 Hz, 2H), 1.17 (t,  $J$  = 7.6 Hz, 3H);  $^{13}\text{C NMR}$  (100 MHz,  $\text{CDCl}_3$ )  $\delta$  142.7, 131.4, 129.3, 128.5, 28.4, 15.7;

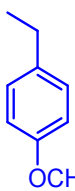

$^1\text{H NMR}$  (400 MHz,  $\text{CDCl}_3$ )  $\delta$  7.13 (d,  $J$  = 8.6 Hz, 2H), 6.87 (d,  $J$  = 8.6 Hz, 2H), 3.81 (s, 3H), 2.61 (q,  $J$  = 7.6 Hz, 2H), 1.23 (t,  $J$  = 7.6 Hz, 3H);  $^{13}\text{C NMR}$  (100 MHz,  $\text{CDCl}_3$ )  $\delta$  157.7, 136.5, 128.8, 113.8, 55.4, 28.1, 16.0

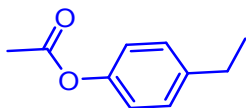

**<sup>1</sup>H NMR (400 MHz, CDCl<sub>3</sub>)**  $\delta$  7.04 (d, *J* = 8.4 Hz, 2 H), 6.79 (d, *J* = 8.4 Hz, 2 H), 2.58 (q, *J* = 7.6 Hz, 2 H), 2.04 (s, 3 H), 1.23 (t, *J* = 7.6 Hz, 3 H). **<sup>13</sup>C NMR (100 MHz, CDCl<sub>3</sub>)**  $\delta$  174.4, 153.8, 136.3, 129.0, 115.3, 28.1, 22.6, 16.0

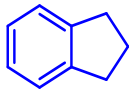

**<sup>1</sup>H NMR (400 MHz, CDCl<sub>3</sub>, )**  $\delta$  7.24-7.21 (m, 2H), 7.13-7.11 (m, 2H), 2.91(t, *J* = 7.5 Hz, 4H), 2.10-2.02 (m, 2H); **<sup>13</sup>C NMR (100 MHz, CDCl<sub>3</sub>)**  $\delta$  144.2, 126.1, 124.5, 32.9, 25.6;

## Mass spectra of the products

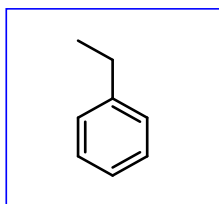

Chromatogram 2 C:\GCMSsolution\Data\Bilal Hoca\20200512\2.qgd

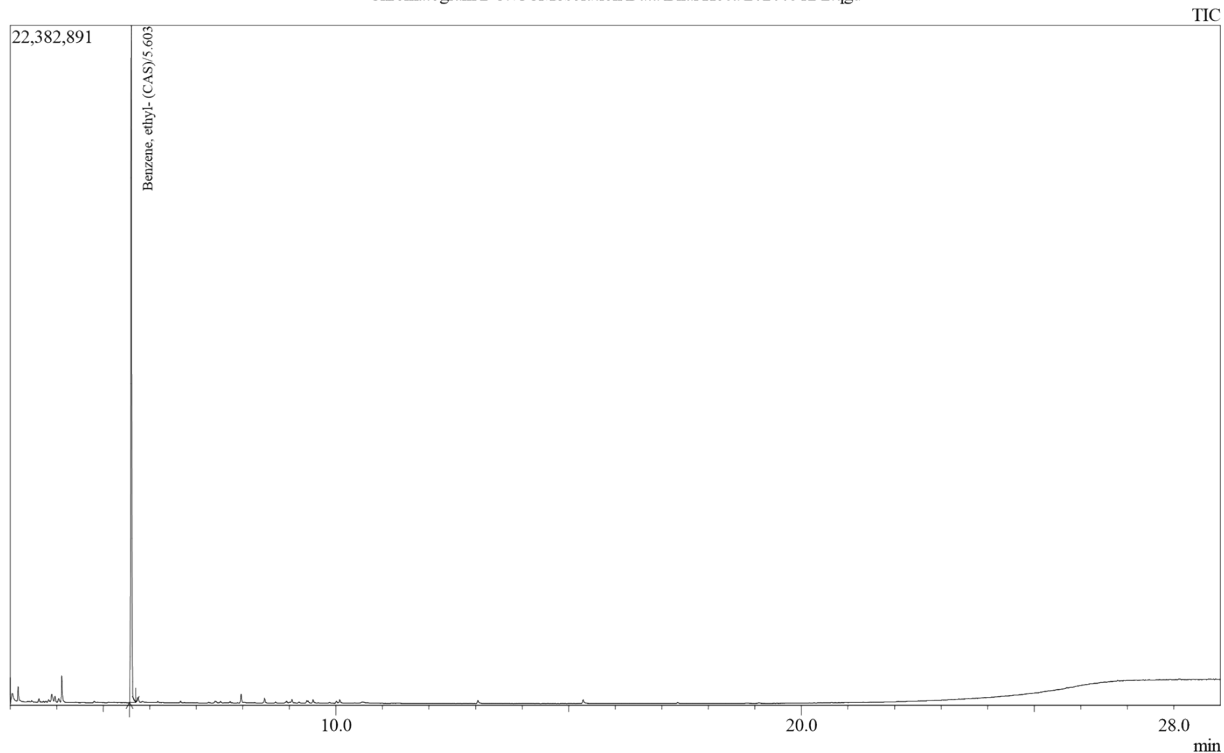

| Peak# | R.Time | Area     | Area%  | Height   | Name                  |
|-------|--------|----------|--------|----------|-----------------------|
| 1     | 5.603  | 35333450 | 100.00 | 22282726 | Benzene, ethyl- (CAS) |
|       |        | 35333450 | 100.00 | 22282726 |                       |

RawMode:Single 5.605(522) BasePeak:91(8195006)  
BG Mode:None Group 1 - Event 1

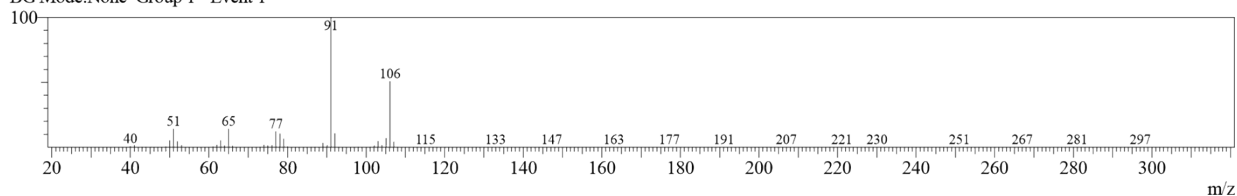

**MS-C<sub>8</sub>H<sub>10</sub> (106) m/z (%):** 106 (M<sup>+</sup>, 52), 91 (100), 77 (9), 65 (17), 51 (15).

**Figure S24. GC-MS spectrum of 4g**

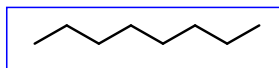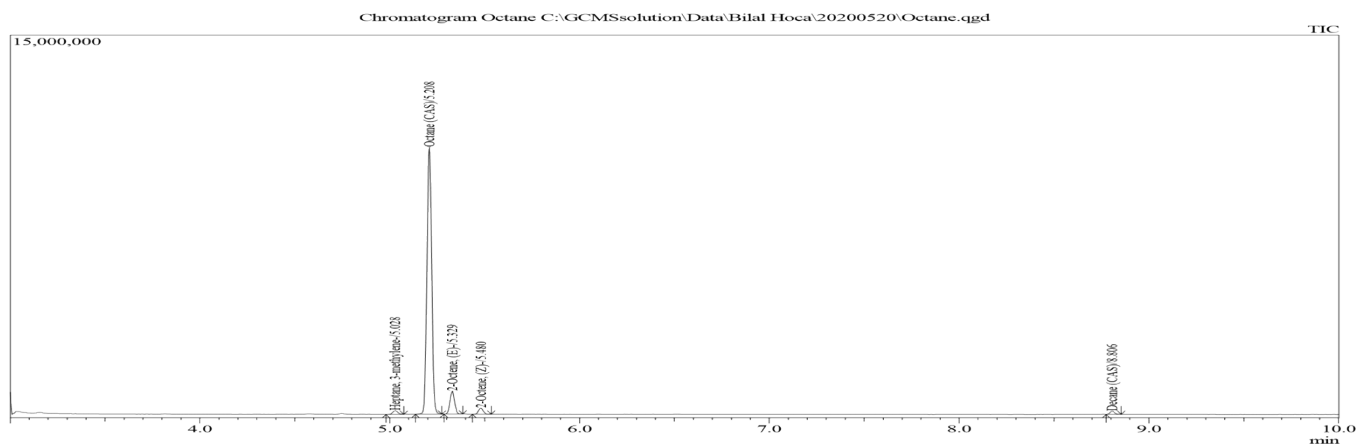

| Peak#    | R.Time | Area     | Area% | Height   | Name                  |
|----------|--------|----------|-------|----------|-----------------------|
| 1        | 5.028  | 275792   | 1.33  | 147415   | Heptane, 3-methylene- |
| 2        | 5.208  | 18262631 | 88.20 | 10542756 | Octane (CAS)          |
| 3        | 5.329  | 1530337  | 7.39  | 904485   | 2-Octene, (E)-        |
| 4        | 5.480  | 426902   | 2.06  | 246527   | 2-Octene, (Z)-        |
| 5        | 8.806  | 210113   | 1.01  | 125932   | Decane (CAS)          |
| 20705775 | 100.00 | 11967115 |       |          |                       |

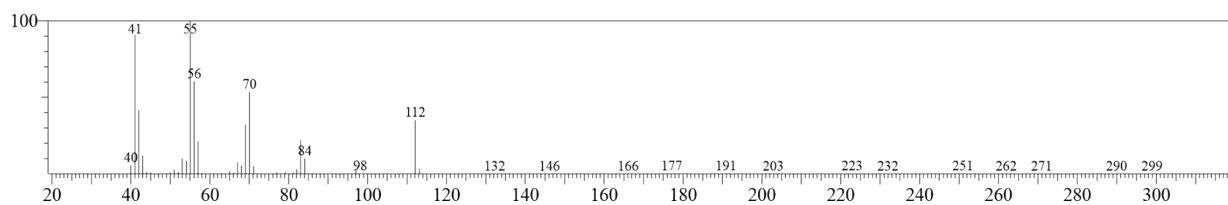

**MS-C<sub>8</sub>H<sub>18</sub> (112) m/z (%):** 112 (M<sup>+</sup>, 55), 70 (50), 56 (52), 55 (100), 41 (80).

**Figure S25. GC-MS spectrum of 4h**

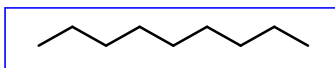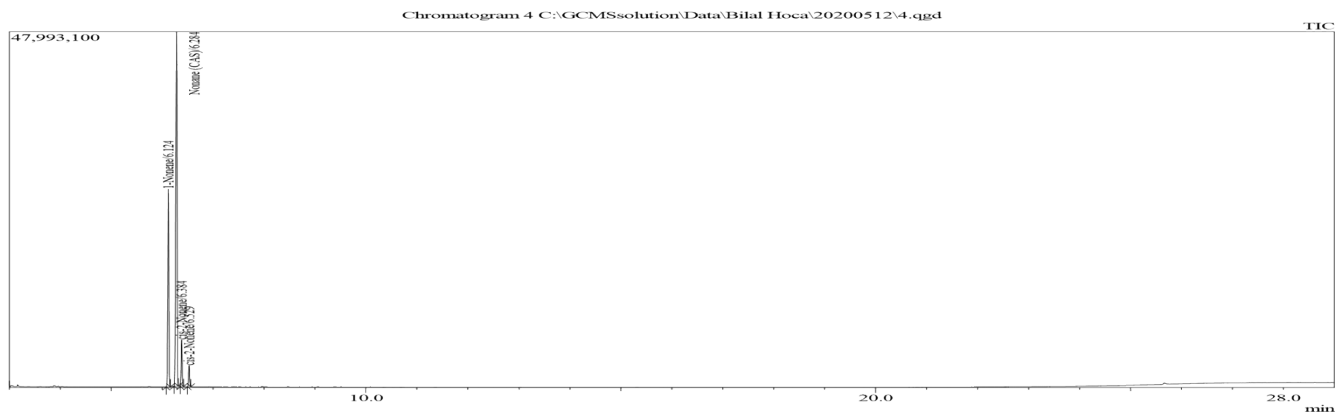

| Peak#     | R.Time | Area     | Area% | Height   | Name         |
|-----------|--------|----------|-------|----------|--------------|
| 1         | 6.124  | 39384838 | 28.22 | 26685254 | 1-Nonene     |
| 2         | 6.284  | 87493229 | 62.70 | 47774231 | Nonane (CAS) |
| 3         | 6.384  | 8649882  | 6.20  | 6304185  | cis-2-Nonene |
| 4         | 6.529  | 4020147  | 2.88  | 2855657  | cis-2-Nonene |
| 139548096 | 100.00 | 83619327 |       |          |              |

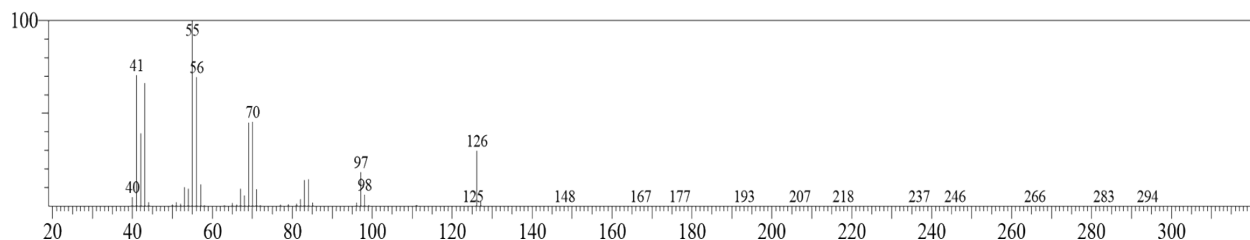

**MS-C<sub>9</sub>H<sub>20</sub> (126) m/z (%): 126 (M<sup>+</sup>, 40), 70 (50), 56 (70), 55 (100), 41 (70).**

**Figure S26. GC-MS spectrum of 4i**

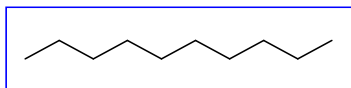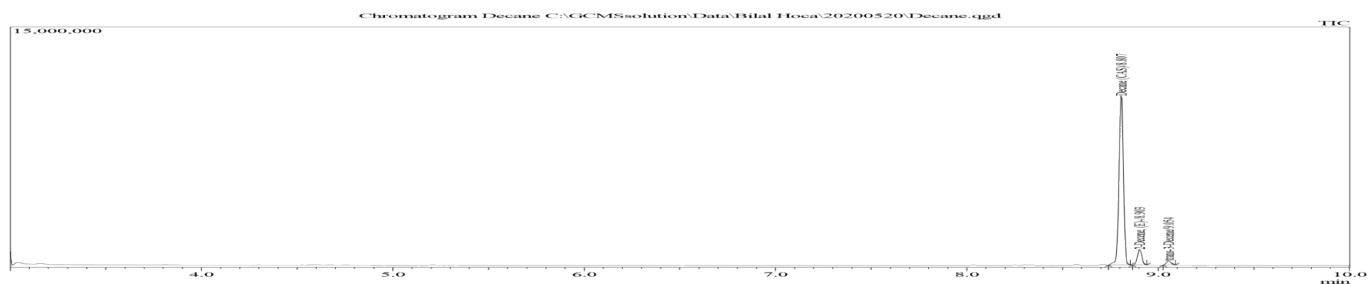

| Peak# | R.Time | Area     | Area% | Height   | Name           |
|-------|--------|----------|-------|----------|----------------|
| 1     | 8.807  | 17430187 | 89.52 | 10615332 | Decane (CAS)   |
| 2     | 8.903  | 1600718  | 8.22  | 973738   | 2-Decene, (E)- |
| 3     | 9.054  | 440188   | 2.26  | 270790   | trans-3-Decene |

RawMode:Averaged 8.900-8.910(1181-1183) BasePeak:55(137218)  
 BG Mode:Calc. from Peak Group 1 - Event 1

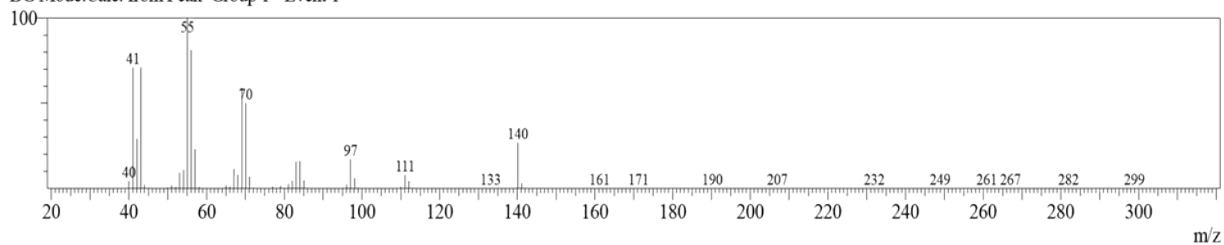

Line#3 R.Time:9.055(Scan#:1212)

**MS-C<sub>10</sub>H<sub>22</sub> (140) m/z (%):** 140 (M<sup>+</sup>, 40), 97 (20), 70 (50), 55 (100), 41 (70).

**Figure S27. GC-MS spectrum of 4i**

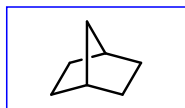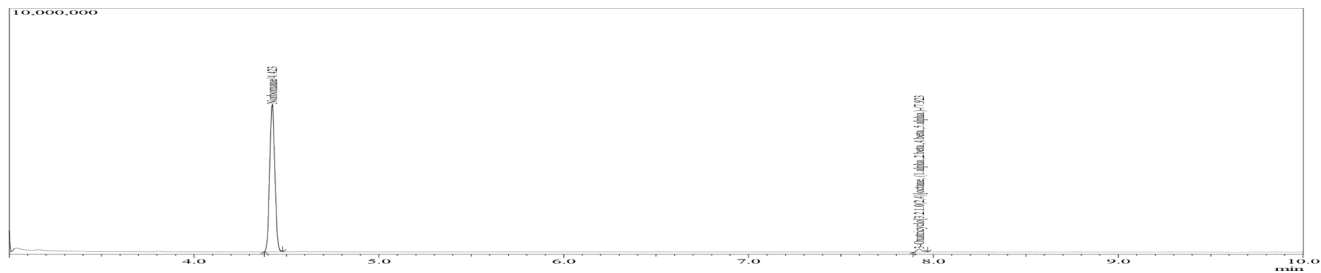

| Peak#    | R.Time | Area     | Area% | Height  | Name                                                                    |
|----------|--------|----------|-------|---------|-------------------------------------------------------------------------|
| 1        | 4.423  | 11689971 | 97.97 | 6031987 | Norbornane                                                              |
| 2        | 7.923  | 242752   | 2.03  | 122037  | 3-Oxatricyclo[3.2.1.0(2,4)]octane, (1.alpha.,2.beta.,4.beta.,5.alpha.)- |
| 11932723 | 100.00 | 6154024  |       |         |                                                                         |

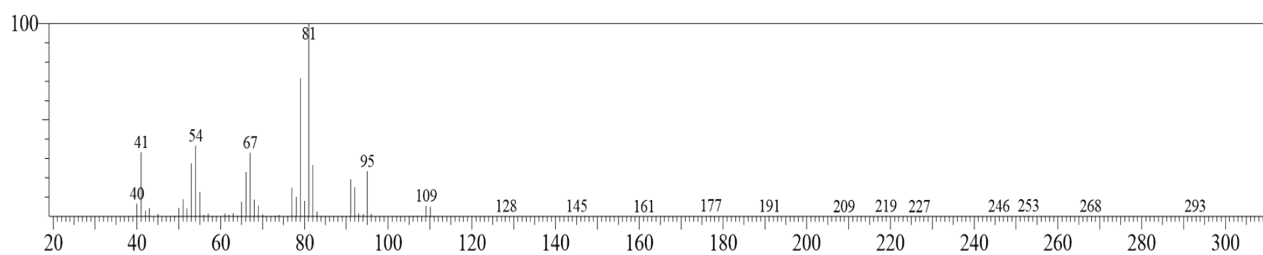

**MS-C<sub>7</sub>H<sub>12</sub> (95) m/z (%):** 95 (M<sup>+</sup>, 20), 81 (100), 67 (40), 54(40), 41 (30).

**Figure S28. GC-MS spectrum of 4k**

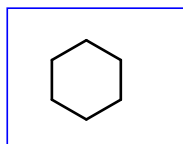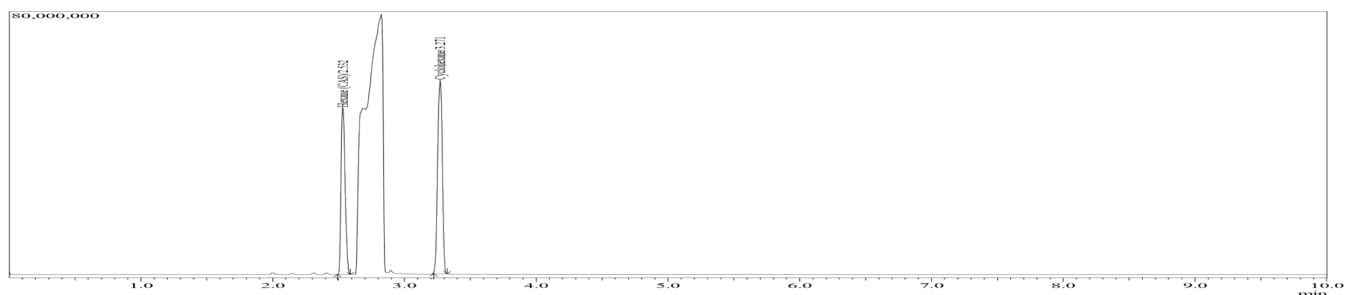

| Peak# | R.Time    | Area      | Area%  | Height    | Name         |
|-------|-----------|-----------|--------|-----------|--------------|
| 1     | 2.532     | 106756336 | 43.06  | 50821337  | Hexane (CAS) |
| 2     | 3.271     | 141186798 | 56.94  | 58923378  | Cyclohexane  |
|       | 247943134 |           | 100.00 | 109744715 |              |

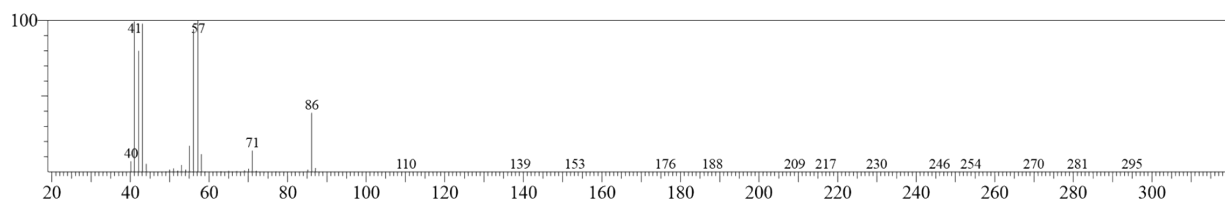

**MS-C<sub>6</sub>H<sub>12</sub> (86) m/z (%):** 86 (M<sup>+</sup>, 42), 71 (10), 57 (100), 41 (100), 40(5).

**Figure S29. GC-MS spectrum of 4I**



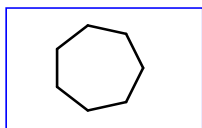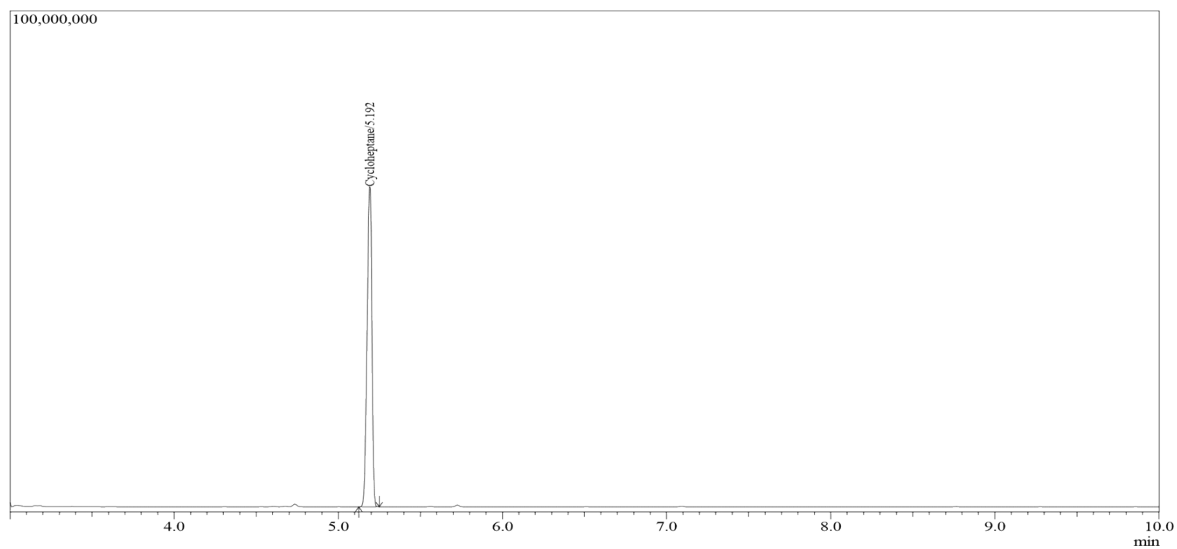

Peak# R.Time Area Area% Height Name  
1 5.192 132753785 100.00 64480842 Cycloheptane  
132753785 100.00 64480842  
RawMode:Averaged 5.185-5.195(438-440) BasePeak:56(7625323)  
BG Mode:Calc. from Peak Group 1 - Event 1

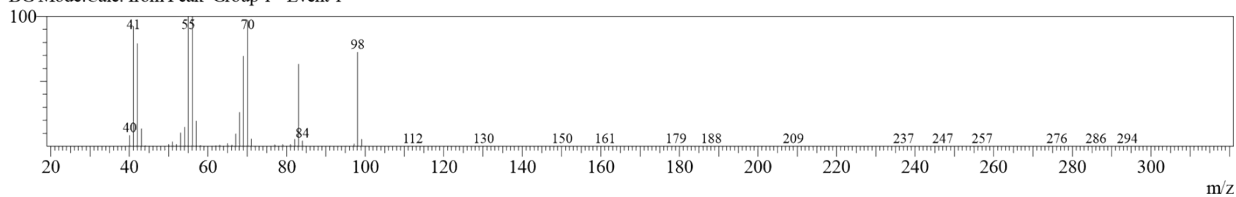

**MS-C<sub>7</sub>H<sub>14</sub> (98) m/z (%):** 98 (M<sup>+</sup>, 70), 84(60), 70(90), 55 (100), 41 (80).

**Figure S30. GC-MS spectrum of 4m**

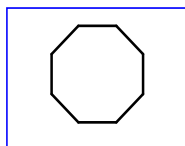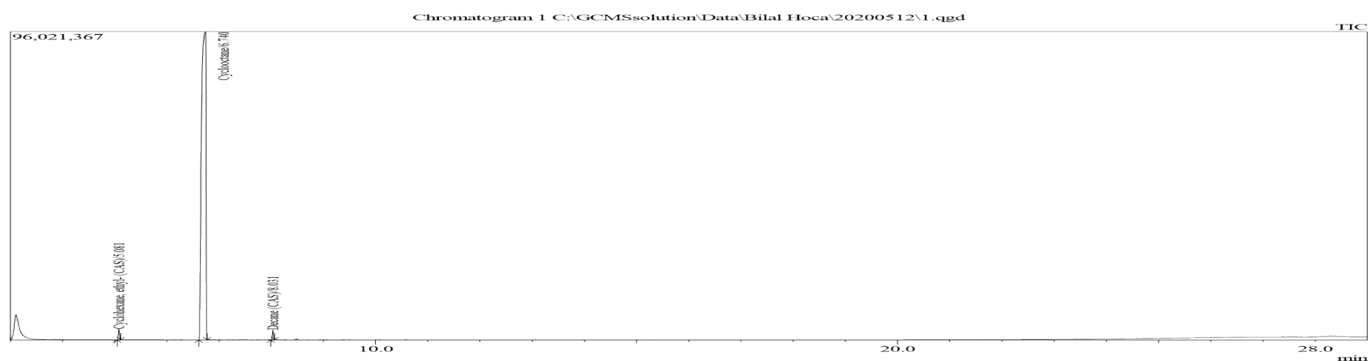

| Peak#     | R.Time | Area      | Area% | Height   | Name                      |
|-----------|--------|-----------|-------|----------|---------------------------|
| 1         | 5.081  | 4714142   | 0.82  | 3278780  | Cyclohexane, ethyl- (CAS) |
| 2         | 6.740  | 566732063 | 98.45 | 95935958 | Cyclooctane               |
| 3         | 8.031  | 4207400   | 0.73  | 3006170  | Decane (CAS)              |
| 575653605 | 100.00 | 102220908 |       |          |                           |

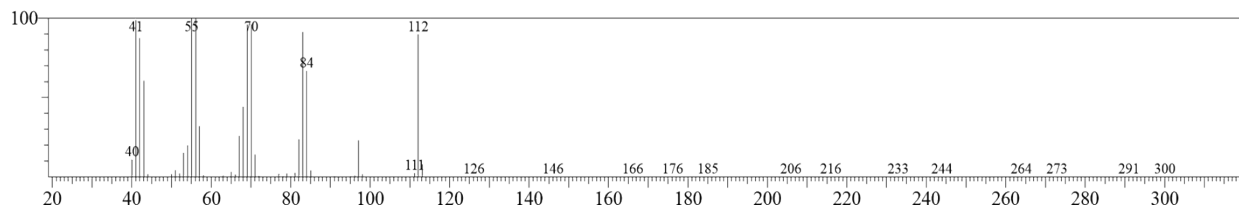

**MS-C<sub>8</sub>H<sub>16</sub> (112) m/z (%):** 112 (M<sup>+</sup>, 85), 84(60), 70 (88), 55 (100), 41(98).

**Figure S31. GC-MS spectrum of 4n**
